1 **Pac1/LIS1 promotes an uninhibited conformation of**  
2 **dynein that coordinates its localization and activity**

3  
4  
5 Matthew G. Marzo\*, Jacqueline M. Griswold\* and Steven M. Markus\*‡  
6  
7  
8  
9  
10  
11

12  
13 \*Department of Biochemistry and Molecular Biology, Colorado State University, Fort  
14 Collins, Colorado, USA  
15

16  
17 ‡Corresponding author  
18  
19  
20  
21  
22  
23  
24  
25  
26  
27  
28  
29  
30  
31  
32  
33  
34  
35  
36  
37  
38  
39  
40

41 Contact information for corresponding author:  
42 Steven M. Markus  
43 Email: [steven.markus@colostate.edu](mailto:steven.markus@colostate.edu)  
44

45 **ABSTRACT**

46 Cytoplasmic dynein is a minus end-directed microtubule motor that transports myriad  
47 cargos in various cell types and contexts. How dynein is regulated to perform all these  
48 activities with a high degree of spatial and temporal precision is unclear. Recent studies  
49 have revealed that human dynein-1 and dynein-2 can be regulated by a mechanism of  
50 autoinhibition, whereby intermolecular contacts limit motor activity. Whether this  
51 autoinhibitory mechanism is conserved throughout evolution, whether it can be affected  
52 by extrinsic factors, and its precise role in regulating cellular dynein activity remain  
53 unknown. Here, we use a combination of negative stain EM, single molecule motility  
54 assays, genetic, and cell biological techniques to show that the autoinhibitory  
55 conformation is conserved in budding yeast, and it plays an important role in  
56 coordinating dynein localization and function in cells. Moreover, we find that the  
57 Lissencephaly-related protein, LIS1 (Pac1 in yeast) plays an important role in regulating  
58 this autoinhibitory conformation of dynein. Specifically, our studies demonstrate that  
59 rather than inhibiting dynein motility, Pac1/LIS1 promotes dynein activity by stabilizing  
60 the uninhibited conformation, which ensures appropriate localization and activity of  
61 dynein in cells.

## 62 INTRODUCTION

63           Cytoplasmic dynein is an enormous minus end-directed microtubule motor  
64 complex that transports numerous cargoes. At first glance, this motor seems  
65 exceedingly complex in terms of its architecture, size, and reliance on accessories and  
66 regulators for proper activity. For instance, processive single molecule motility of human  
67 dynein – itself comprised of 4 to 6 subunits – requires the 11 subunit dynactin complex  
68 in addition to an adaptor that links them together<sup>1,2</sup>. Although yeast dynein does not  
69 require dynactin for *in vitro* single molecule motility<sup>3</sup>, it does require this complex for *in*  
70 *vivo* activity<sup>4,5</sup>. Recent studies have yielded invaluable insight into the underlying  
71 reasons for the complexity of the dynein motor. For instance, the reliance on adaptors  
72 (e.g., BicD2, Spindly, Hook3<sup>1,2</sup>) to link dynein to dynactin ensures that cytoplasmic  
73 dynein-1 – which effects motility of numerous and varied cargoes throughout the cell  
74 cycle<sup>6</sup> – and dynactin are linked together at the right place (and presumably time) for  
75 appropriate motility. Additionally, recent studies have revealed that dynactin helps to  
76 orient the motor domains in a parallel manner that is conducive for motility<sup>7</sup>, thus  
77 revealing the mechanistic basis for dynein’s reliance on this large complex. Thus, the  
78 complexity of this molecular motor ensures that cargoes are transported to their target  
79 destinations in accordance with the needs of the cell.

80           In addition to its regulation by extrinsic factors, several studies have  
81 demonstrated that human dynein-1 and dynein-2 can also be auto-regulated by intra-  
82 complex interactions. Specifically, intermolecular interactions between the motor  
83 domains have been shown to stabilize an autoinhibited conformation of human dynein  
84 called the phi particle (named for its resemblance to the Greek letter)<sup>7-10</sup>. In the case of

85 dynein-2 (responsible for intraflagellar transport), the phi particle conformation – which  
86 has been observed in its native context<sup>10</sup> – reduces its velocity, ATPase activity and  
87 microtubule landing rate<sup>9</sup>. Similarly, the autoinhibited dynein-1 conformation has been  
88 shown to reduce its microtubule landing rate and motility properties<sup>7,11</sup>. Moreover, unlike  
89 dynein-2 which is not regulated by dynactin<sup>12</sup>, uninhibited dynein-1 mutants interact  
90 more readily with dynactin and the adaptor BicD2<sup>7</sup>.

91         Although it is well established that human dynein adopts the autoinhibited phi  
92 particle conformation (both dynein-1 and dynein-2), it is unclear if this conformational  
93 state is evolutionarily conserved. Yeast dynein is of particular interest due to two  
94 notable *in vitro* discrepancies with human dynein. In particular, unlike human dynein,  
95 yeast dynein is processive in single molecule assays without the need for other factors,  
96 such as dynactin<sup>3</sup>. The second notable feature that distinguishes yeast dynein is its  
97 apparent ability to interact with dynactin in the absence of any additional factors (*i.e.*,  
98 adaptors)<sup>13</sup>. The reasons for these differences are unclear, but one possibility is that  
99 yeast dynein does not adopt the autoinhibited phi particle conformation, which could  
100 potentially account for its ability to walk in the absence of dynactin. This is supported by  
101 studies showing that artificially separating the motor domains of human dynein-1 with a  
102 rigid linker (thus preventing intermolecular contacts) is sufficient to convert it to a  
103 processive motor<sup>11</sup>.

104         In addition to dynactin, the Lissencephaly protein LIS1 is another important  
105 effector of dynein activity that is required for numerous dynein functions in cells<sup>14,15</sup>.  
106 These include promoting dynein recruitment to various cellular sites<sup>16,17</sup>, and assisting in  
107 dynein transport functions, including nuclear migration in neurons<sup>18,19</sup>, and high-load



108 vesicular transport<sup>20-23</sup>. However, the mechanism by which LIS1 affects dynein, or  
109 dynein-dynactin activity remains controversial. For instance, *in vitro* studies have shown  
110 that LIS1 can either reduce<sup>23-25</sup> (for dynein alone) or increase dynein velocity (in the  
111 context of intact dynein-dynactin-BicD2 complexes)<sup>25,26</sup>. In addition to promoting *in vitro*  
112 force production by dynein<sup>23</sup>, studies have also shown that LIS1 can help in the initiation  
113 of dynein-dynactin-BicD2 motility from the plus ends of dynamic microtubules<sup>25,27</sup>.  
114 Studies with the budding yeast homolog of LIS1 – Pac1 – have shown that it reduces  
115 the velocity of dynein motility<sup>28-31</sup>, presumably by uncoupling the ATPase cycle from the  
116 conformational changes in the motor and microtubule-binding domains that elicit  
117 microtubule release<sup>29,30</sup>. Thus, the precise role for Pac1/LIS1 in dynein function remains  
118 confounded by these contrasting results. Although a role for Pac1/LIS1 in regulating the  
119 autoinhibited conformation has not yet been reported, two studies found that LIS1 can  
120 indeed promote dynein-dynactin interaction<sup>32,33</sup>, which is an expected consequence of  
121 relieving dynein autoinhibition<sup>7</sup>.

122         Here, we set out to address the question of whether yeast dynein adopts an  
123 autoinhibited phi particle conformation, and if so, what role it plays in regulating *in vitro*  
124 and *in vivo* dynein activity. Our recent findings suggested the potential for yeast dynein  
125 to adopt such a conformation<sup>34</sup>. Specifically, we found that engineering a neurological  
126 disease-correlated mutation into yeast dynein leads to increased run lengths of single  
127 molecules of dynein, and a localization pattern in cells that is suggestive of an  
128 enhanced dynein-dynactin interaction. This mutation was within the linker domain – the  
129 mechanical element responsible for the powerstroke<sup>35</sup> – at a residue that was recently  
130 shown to be important for maintenance of the phi particle conformation of human

131 dynein<sup>7</sup>. Here, we use a combination of single particle analysis (by negative stain EM),  
132 single molecule motility assays, genetic, and cell biological approaches to show that  
133 yeast dynein indeed adopts a phi particle conformation that restricts its *in vitro*  
134 processivity, and coordinates its localization and activity in cells. Moreover, we find that  
135 Pac1 is an important regulator of the phi particle conformation. In particular, we found  
136 that rather than inhibiting dynein motility, Pac1 promotes its activity by stabilizing the  
137 'open', uninhibited conformational state. Our findings help explain recent observations  
138 with LIS1<sup>25,26</sup>, and support a model whereby Pac1/LIS1 is a key effector of dynein  
139 autoinhibition.

140

## 141 **RESULTS**

### 142 **Yeast dynein adopts an autoinhibited 'phi' particle conformation**

143 We sought to determine whether yeast dynein adopts an autoinhibited  
144 conformation (the 'phi' particle<sup>8</sup>). To this end, we developed a strategy to isolate  
145 biochemical quantities of the intact yeast dynein complex that are of sufficient purity for  
146 single particle analysis by negative stain electron microscopy. The yeast dynein  
147 complex is comprised of light (Dyn2), light-intermediate (Dyn3), intermediate (Pac11),  
148 and heavy chains (Dyn1)<sup>36</sup>. We generated a polycistronic plasmid containing all four  
149 dynein complex subunits each flanked by a strong, galactose-inducible promoter  
150 (*GAL1p*) on the 5' end, and a synthetic transcriptional terminator ( $T_{\text{synth3}}$ <sup>37</sup>) on the 3'  
151 end. We included a tandem affinity tag (8His-ZZ, or "HZZ") followed by either a SNAP or  
152 HALO tag on the N-terminus of Dyn1 for purification and fluorescent labeling of the  
153 complex, respectively. In addition to these four gene cassettes, the plasmid also

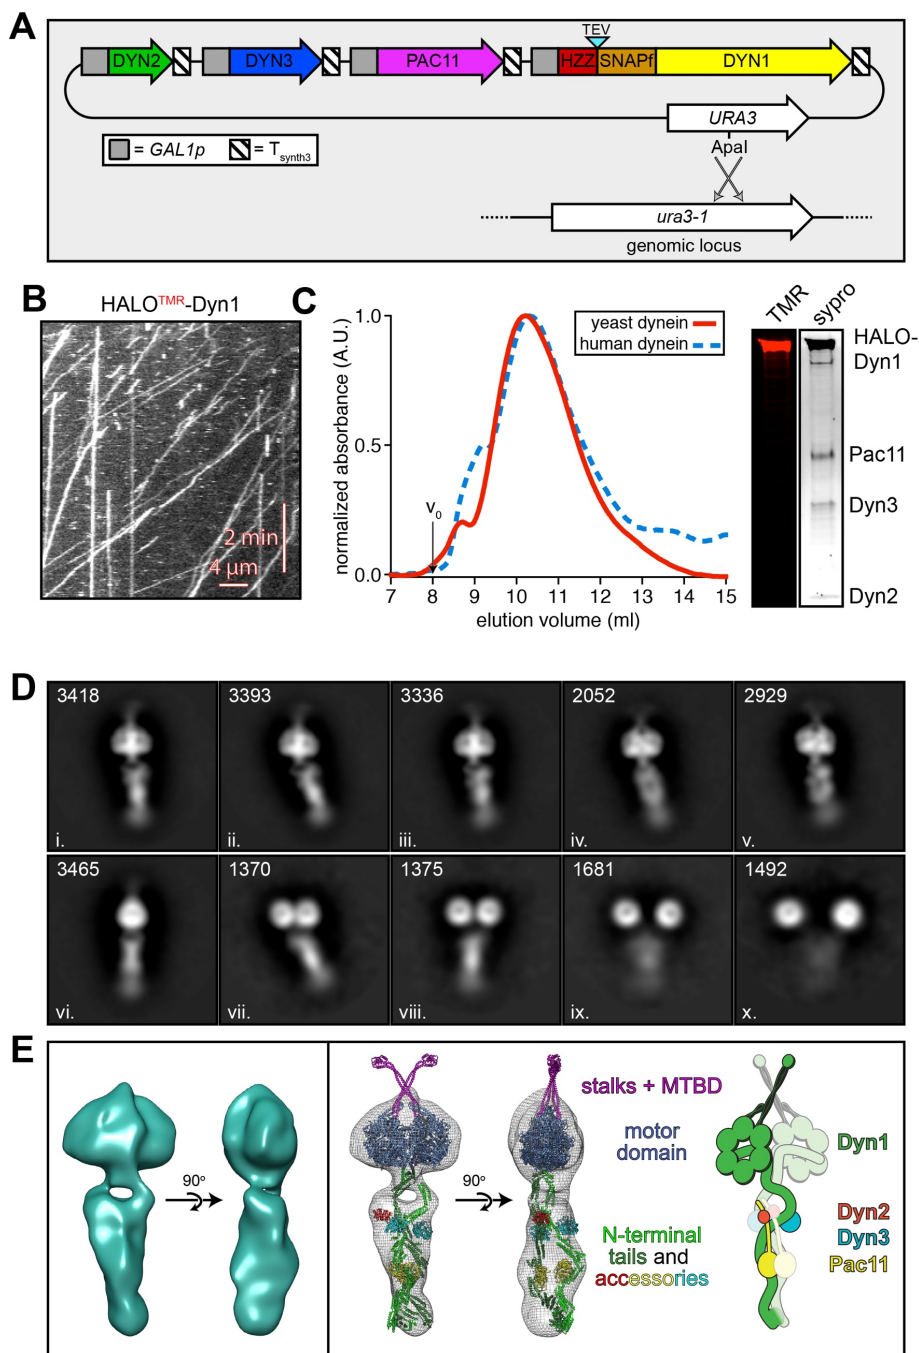

**Figure 1. The yeast dynein complex adopts an autoinhibited phi particle conformation.** (A) Schematic of the polycistronic plasmid used to produce the intact yeast dynein complex. Restriction digest with *Apal* (cuts within *URA3* gene) targets the plasmid for homologous recombination into the *ura3-1* locus as depicted. (B) Representative kymograph depicting single molecule motility of the purified overexpressed yeast dynein complex. (C) Elution profiles of yeast and human dynein complexes from Superose 6 resin (left), and scans of the same polyacrylamide gel depicting fluorescently labeled Dyn1 (via HaloTag-TMR) and the entire complex (via Sypro Ruby staining; right). (D) Representative negative stain EM class averages of the intact yeast dynein complex. Number of particles used to generate each class indicated in each panel. Classes i – vi depict dynein in the autoinhibited, phi particle conformation, whereas vii – x depict dynein in various open, uninhibited states. (E) 3D models of dynein in the autoinhibited state generated from 2D class averages with (right) and without (left) a high resolution 3D structure of human dynein-1 in the phi particle conformation (pdb 5NVU) manually docked into it. Note that the structures of the two tail domains have been slightly rotated with respect to the motor domains to better fit the 3D model, and that the structures of both TcTEX and Rob1 have been eliminated due to their absence from the yeast dynein complex. Also see Video S1.

155 contains a *URA3* cassette that provides a sequence for recombination-based genomic  
156 integration (into the native *ura3-1* allele) and a selectable marker (see Fig. 1A). Cells  
157 with the plasmid integrated into their genome were grown in galactose-containing  
158 media, and the dynein complex was subsequently isolated from cell lysates using either  
159 tandem nickel/IgG affinity, or IgG affinity alone. We estimate the yield of the  
160 overexpressed complex to be at least 50-fold greater than the non-overexpressed  
161 complex. Single molecule motility assays confirmed the activity of the overexpressed  
162 complex to be nearly identical to the non-overexpressed complex (Fig. 1B; also see Fig.  
163 4B and 5). Importantly, the increased yield permitted us to isolate the complex to a high  
164 degree of purity using size exclusion chromatography, which revealed an elution profile  
165 nearly identical to the human dynein complex isolated from insect cells (Fig. 1C).

166 With the high purity dynein complex in hand, we used negative stain electron  
167 microscopy to obtain the first ever high magnification view of the intact yeast dynein  
168 complex. This revealed the presence of several conformational states, including those  
169 in an open, uninhibited state (Fig. S1A, green arrow), and those in an apparent phi  
170 particle conformation (Fig. S1A, red arrows), with the large majority being in the latter  
171 state (Fig. S1B). Reference-free 2D class averages provided images that appear  
172 strikingly similar to the intact human dynein-1 complex<sup>1,7</sup>, and to an artificially dimerized  
173 motor domain truncation of dynein-2 in a phi particle conformation<sup>9</sup> (Fig. 1D).  
174 Specifically, the N-terminal tail domains – which exhibit flexibility with respect to the  
175 motor domains – appear to be twisted around one another, which we confirmed by  
176 generating three-dimensional reconstructions (Fig. 1E, left, and Video S1).  
177 Intermolecular contacts appear to extend to the motor domains and the coiled-coil

178 stalks, which connect the AAA ring to the microtubule-binding domains (MTBDs). Much  
179 like the human dynein-1 and dynein-2 structures, the stalks cross each other in an “X”-  
180 like configuration in a manner that seems contrary to motility. We confirmed the high  
181 degree of similarity between the human and yeast dynein-1 phi particle conformations  
182 by manually docking a high resolution cryo-EM structure of human dynein (pdb 5NVU<sup>7</sup>)  
183 into our 3D model (Fig. 1E, right, and Video S1).

184         Of note, previous observations of an artificially-dimerized (via glutathione S-  
185 transferase, GST), truncated yeast dynein motor domain fragment (lacking the N-  
186 terminal tail domain) revealed a lack of phi particle conformations. This includes  
187 observations by negative stain EM<sup>28</sup>, and within the crystal lattice of the crystalized  
188 motor domain fragment<sup>38,39</sup>. Thus, in contrast to the dynein-2 isoform of dynein, for  
189 which the motor domain is sufficient to adopt the phi particle conformation (as apparent  
190 in the crystal lattice and by negative stain EM<sup>9,40</sup>), yeast dynein requires the tail domain  
191 for assembly of this autoinhibited conformation. It is interesting to note that several of  
192 our class averages appear to depict a conformation in which the motor domains are  
193 closely apposed, but unbound, and the tails appear to be wrapped around one another  
194 (Fig. 1D; classes vii and viii). Taken together, this suggests that contact points within the  
195 tail domain provide important contacts that likely stabilize the autoinhibited  
196 conformation.

197  
198 **Disruption of the autoinhibited conformation leads to increased single molecule**  
199 **processivity**

200         We previously found that a disease-correlated amino acid substitution within the  
201 linker domain – the mechanical element responsible for the powerstroke – leads to an

202 increase in single molecule run length<sup>34</sup>. This residue (K1475) is equivalent to one  
203 known to stabilize the autoinhibited conformation of human dynein (R1567)<sup>7</sup>. If the  
204 increased processivity is a consequence of disrupted phi particle formation, then we  
205 reasoned that mutations at other potential phi particle interfaces would also lead to  
206 increased run lengths. A high resolution cryo-EM structure of the human dynein phi  
207 particle identified four distinct surfaces that comprise the inter-molecular interface  
208 (linker-linker, linker-AAA4, AAA5-AAA5, and stalk-stalk; Fig. 2A)<sup>7</sup>. Given the apparent  
209 similarities between the yeast and human dynein phi particles (see Fig. 1E and Video  
210 S1), we wondered whether the intermolecular contact points were conserved, and if so,  
211 what effect disrupting the phi particle has on dynein motility.

212         Sequence alignment and homology modeling of pertinent regions of Dyn1 (those  
213 at the intermolecular interface) into the high resolution cryo-EM structure of the human  
214 dynein phi particle (pdb 5NVU<sup>7</sup>) revealed a high degree of conservation at the four  
215 intermolecular surfaces (Fig. 2A). We focused initially on the linker-AAA4 interface (Fig.  
216 2A, surface 2), which is presumably stabilized in part by electrostatic interactions  
217 between negatively charged D2868, and positively charged K1475 and K1517. We  
218 found that substituting either positively charged residue (K1475 or K1517) with a  
219 negatively charged residue (glutamate) resulted in similar increases in single molecule  
220 processivity (from 2.0  $\mu\text{m}$  to 3.4  $\mu\text{m}$  and 3.3  $\mu\text{m}$ , respectively;  $p < 0.0001$ ), while  
221 eliminating both (K1475E K1517E) led to an even greater increase in run length (to 5.8  
222  $\mu\text{m}$ ; Fig. 2B). Consistent with these residues' role in stabilizing the linker-AAA4  
223 interface, substituting the negatively charged D2868 for a positively charged one  
224 (D2868K) led to an increase in run length that was statistically indistinguishable from the



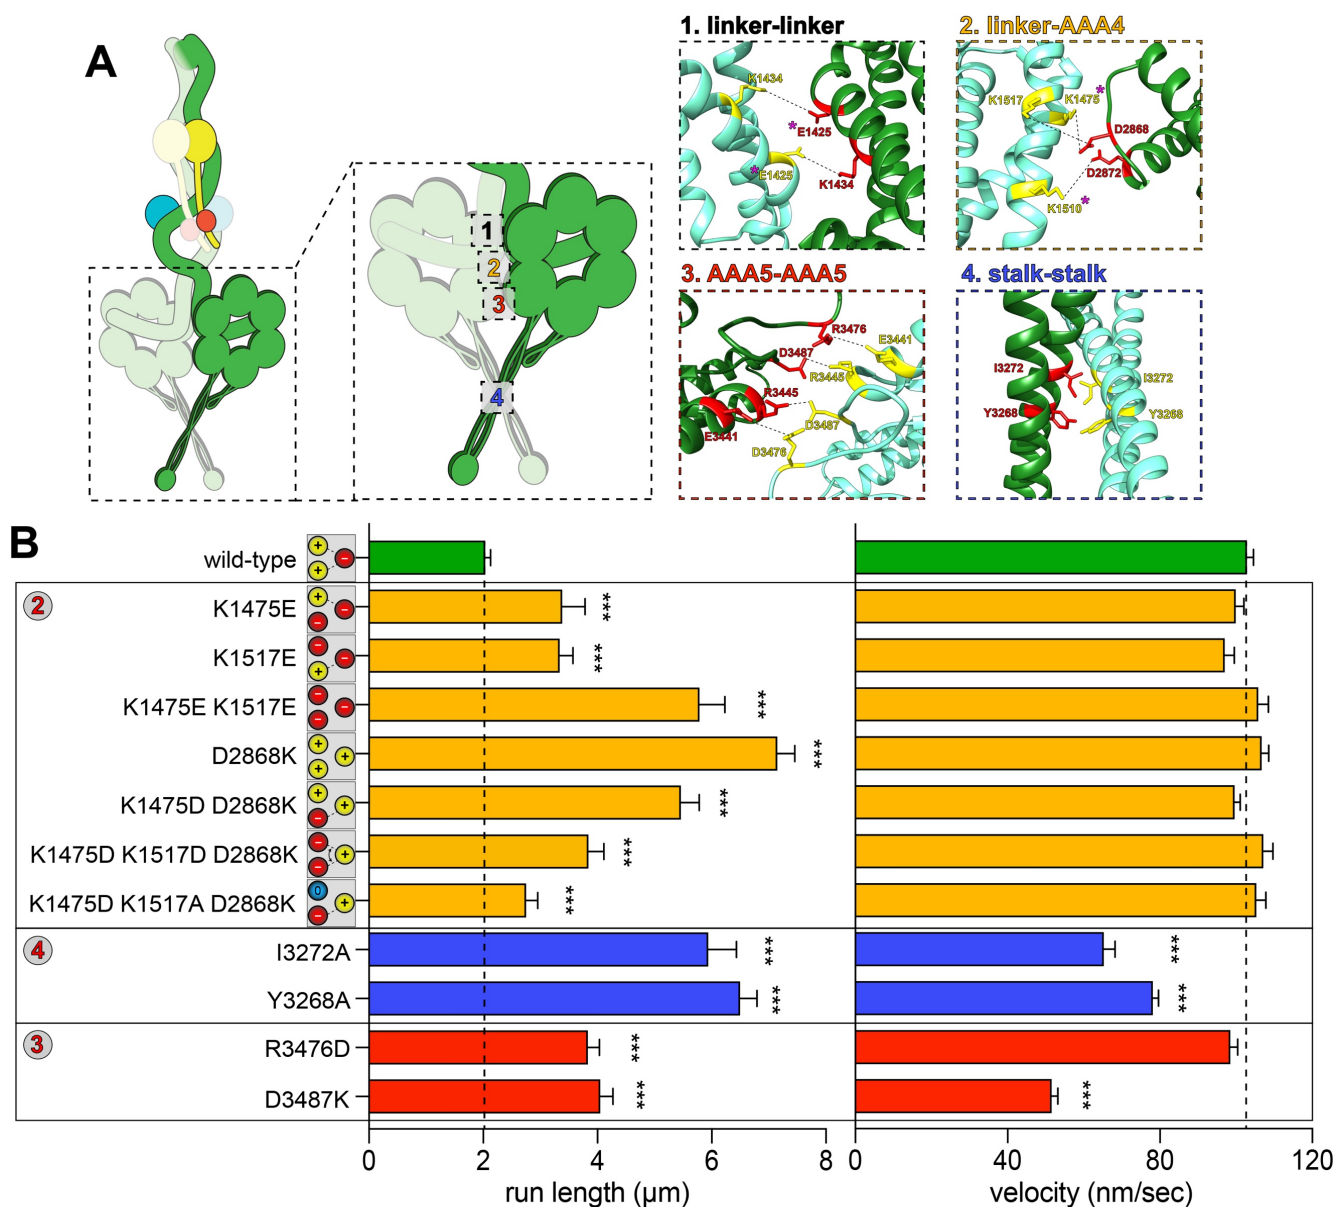

**Figure 2. Disrupting phi particle contact points extends single molecule run lengths.** (A) Cartoon depicting four predicted intermolecular contact surfaces within the motor domains that stabilize the phi particle conformation. Four insets show respective regions of yeast dynein modeled into human dynein phi particle structure. Structural models were generated using one-to-one threading of the yeast *DYN1* sequence into 5NVU<sup>7</sup> on the Phyre2 server<sup>72</sup>. Residues with magenta asterisks are mutated in patients suffering from neurological disease<sup>62-64</sup> (see Discussion). (B) Single molecule run length (from fitting of raw data to one-phase decay) and velocity values for wild-type and mutant dyneins with phi particle disrupting mutations (at surfaces 2, 3 and 4, as indicated). Cartoons along vertical axis depict electrostatic interactions (or lack thereof) among residues 1517, 1475 (left circles) and 2868 (right circle) at linker-AAA4 surface. Note that the degree of processivity enhancement is inversely proportional to the number of charge interactions at this surface. Error bars indicate standard error (between 150 - 528 motors from at least two independent experiments were analyzed for each). Statistical significance was determined using a Mann-Whitney test (for run length) or with an unpaired Welch's t test (for velocity; \*\*\*,  $p \leq 0.0001$ ). Also note that we generated and tested the motility of two other point mutants at interface 3, E3441K and R3445D, both of which were inactive in single molecule assays (not shown).

226 K1475E K1517E double mutant (7.2  $\mu\text{m}$ ;  $p = 0.246$ ). Interestingly, we were able to  
227 reduce these run length values by substituting back residues that would be predicted to  
228 replace the broken electrostatic pairing (K1475D D2868K; K1475D K1517A D2868K; or,  
229 K1475D K1517D D2868K). These results indicate that the linker-AAA4 interface is  
230 indeed important for assembly of the autoinhibited conformation of yeast dynein, which  
231 attenuates single molecule processivity of the intact complex.

232 We next wondered if other predicted interfaces affect formation of the  
233 autoinhibited conformation, and what role they play in affecting dynein motility.  
234 Consistent with the apparent interaction surface observed in our 2D averages within the  
235 stalk (Fig. 2A, surface 4; see Fig. 1D, classes i - v), substitution of either Y3268 or I3272  
236 with an alanine led to an increase in run length comparable to those mutants lacking all  
237 electrostatic contacts at the linker-AAA4 interface (Fig. 2B). Unlike the linker-AAA4  
238 interface mutants, both Y3268A and I3272A exhibited reductions in velocity values  
239 (from 102.8 nm/sec to 73.2 nm/sec for Y3268A, or 78.4 nm/sec for I3272A;  $p < 0.0001$ ).  
240 This could be due to disrupted kinetics of helix sliding in the coiled coil stalk (*i.e.*,  
241 changes in the heptad registry), which is responsible for communicating nucleotide-  
242 dependent conformational changes within the motor domain to the microtubule-binding  
243 domain<sup>40-42</sup>. Finally, charge reversal substitutions at either R3476 (to an aspartate) or  
244 D3487 (to a lysine) at the AAA5-AAA5 interface (Fig. 2A, surface 3) also led to  
245 increases in run length (from 2.0  $\mu\text{m}$  to 3.8 and 4.0  $\mu\text{m}$ , respectively;  $p < 0.0001$ )  
246 comparable to the single charge substitution mutants at the linker-AAA4 interface.  
247 Although the R3476D mutant exhibited normal velocity, the D3487K substitution  
248 reduced dynein velocity to approximately half that of wild-type. Taken together, these



249 findings confirm the conserved nature of the intermolecular contact points that stabilize  
250 the autoinhibited state of yeast dynein. They also indicate that the ability to adopt the  
251 phi particle conformation is sufficient to severely limit the processivity of the yeast  
252 dynein complex, which, in the absence of phi particle formation, can achieve run lengths  
253 that match that of the human dynein-dynactin-BicD2 complex (7.2  $\mu\text{m}$  for dynein<sup>D2868K</sup>  
254 versus 5 - 9  $\mu\text{m}$  for human dynein-dynactin-BicD2)<sup>1,2,43</sup>. It is interesting to note that the  
255 minimal, GST-dimerized dynein fragment exhibits run lengths (1.6  $\mu\text{m}$ ; see Fig S5C)  
256 much lower than that achievable by the phi particle disrupting mutants (as high as 7.2  
257  $\mu\text{m}$ , or 4.5-fold higher), in spite of this fragment not adopting the phi particle  
258 conformation. This indicates that the native tail domain permits an arrangement of the  
259 motor domains that is much more conducive to processive motility than the GST moiety.

260

### 261 **Dynein autoinhibition restricts cortical localization**

262 Although preventing human dynein from adopting the autoinhibited conformation  
263 by mutagenesis had no apparent effect on processivity, it did in fact lead to a significant  
264 enhancement in the ability of dynein to interact with dynactin and the adaptor BicD2<sup>7</sup>.  
265 Previous studies have shown that dynactin is required for localization of dynein to  
266 cortical Num1 receptor sites, but not to microtubule plus ends<sup>4,31,44</sup> (Fig. 3A). Moreover,  
267 in instances when dynactin interaction with dynein is enhanced<sup>45,46</sup>, the number of  
268 dynein molecules found at cortical sites increases<sup>46</sup>, and dynein offloading to the cell  
269 cortex becomes apparent from live cell imaging<sup>31</sup>. In light of the limiting nature of  
270 dynactin at microtubule plus ends (1 dynactin complex for every 3 dynein complexes at  
271 a plus end)<sup>46</sup>, these observations suggest that interaction with dynactin is a limiting step

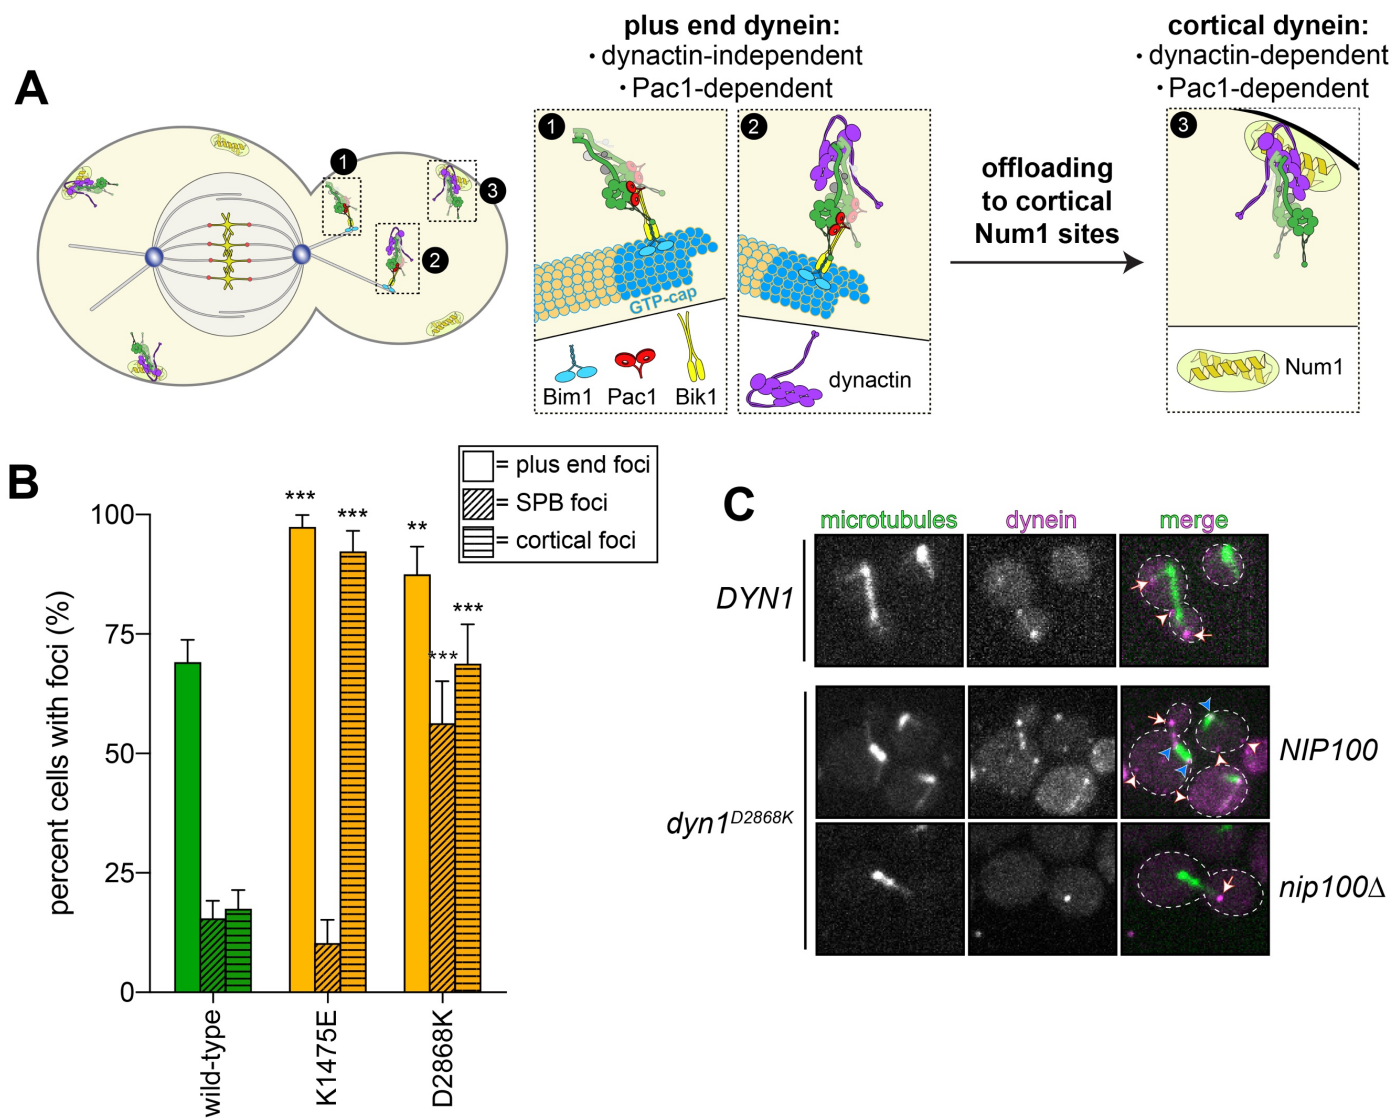

**Figure 3. The autoinhibited conformation restricts plus end and cortical localization of dynein.** (A) Cartoon depicting the two main sites of dynein localization (microtubule plus ends, and cell cortex), and the molecular requirements for each. Dynein plus end localization (1) requires Bik1<sup>57</sup> and Pac1<sup>44</sup>, with Bim1 potentially playing some role in this process, but does not require dynactin<sup>4</sup>. Rather, dynactin plus end localization (2) relies on dynein<sup>4</sup>. Subsequent to plus end targeting, dynein-dynactin complexes are offloaded to cortical Num1 sites<sup>31,73</sup> (3). (B) Plot depicting the frequency of plus end, SPB (spindle pole body) and cortical targeting for wild-type and mutant Dyn1 ( $n \geq 32$  mitotic cells for each). Error bars indicate standard error of proportion. Statistical significance was determined by calculating Z scores (see Methods). (C) Representative images of wild-type or mutant dynein (D2868K) localizing in otherwise wild-type or *nip100Δ* (dynactin component) cells. Note the lack of cortical localization of Dyn1<sup>D2868K</sup> in *nip100Δ* cells (white arrowheads, cortical foci; white arrows, plus end foci; blue arrowheads, SPB foci).

273 in the delivery of dynein to cortical Num1 sites. Thus, if disruption of the autoinhibited  
274 conformation of yeast dynein leads to enhanced dynactin interaction, then we expect to  
275 see an increased frequency of dynein cortical localization.

276 To determine whether this was the case, we compared the localization pattern of  
277 wild-type Dyn1-3GFP to that of the K1475E and D2868K mutants, which exhibited  
278 modest and strong *in vitro* processivity phenotypes, respectively (see Fig. 2B).  
279 Consistent with the notion that disrupting the phi particle promotes interaction with  
280 dynactin, we observed a large increase in the number of cells exhibiting cortical dynein  
281 foci (Fig. 3B and C). Although D2868K had a stronger processivity phenotype in the  
282 single molecule assay, it did not exhibit a stronger cortical localization phenotype than  
283 the K1475E mutant. However, we did note that the D2868K cells possessed a higher  
284 frequency of dynein foci associated with the spindle pole bodies (SPBs), where the  
285 minus ends of microtubules are anchored. Although the relevance of SPB foci is not  
286 entirely clear, we previously noted that dynein complexes accumulated at this site when  
287 they were activated by overexpression of a Num1 coiled-coil-containing fragment<sup>47</sup>.  
288 Thus, the SPB pool of dynein molecules might represent “activated” dynein motors. As  
289 the D2868K mutant exhibited a more robust *in vitro* processivity phenotype than  
290 K1475E, the former mutation likely results in fewer inhibited dynein molecules in cells.  
291 Thus, the increased SPB localization of D2868K is likely a consequence of its increased  
292 activity. Finally, we confirmed that dynactin was indeed required for the cortical  
293 localization of Dyn1<sup>D2868K</sup> by imaging its localization in cells lacking the dynactin  
294 component, Nip100 (Fig. 3C, *nip100Δ*). These data are consistent with the notion that

295 the phi particle restricts dynein-dynactin interaction, which limits association with cortical  
296 Num1 receptor sites.

297

298 **Peptide insertion between motor and tail domains ablates phi particle**  
299 **conformation**

300 In addition to an increase in cortical localization, we also noted that the K1475E  
301 and D2868K mutants localized to microtubule plus ends to a greater extent than wild-  
302 type dynein (see Fig. 3B;  $p \leq 0.040$ ). We previously noted that the frequency of plus end  
303 localization – which is Pac1-dependent<sup>44</sup> (see Fig. 3A) – is increased for a truncated  
304 dynein motor domain fragment (Dyn1<sub>MOTOR</sub>)<sup>48</sup>, and also for a dynein mutant in which a  
305 helical linker peptide (helical linker 3, HL3) was inserted between the tail and motor  
306 domains (Dyn1<sub>HL3</sub>; see Fig. 4A)<sup>31</sup>. Of note, Dyn1<sub>HL3</sub> also localizes to the cell cortex to a  
307 greater extent than wild-type Dyn1<sup>31</sup>, much like an isolated tail domain fragment  
308 (Dyn1<sub>TAIL</sub>)<sup>48</sup>. We originally generated the Dyn1<sub>HL3</sub> mutant to test the hypothesis that the  
309 motor domain plays a direct role in restricting the

310 cortical localization capacity of Dyn1<sub>TAIL</sub><sup>31</sup>. We predicted that insertion of the HL3  
311 peptide would sufficiently separate the tail and motor domains such that the motor  
312 domain would no longer be able to block the tail domain's interaction with cortical Num1  
313 receptors (*i.e.*, by “unmasking” the tail domain; see Fig. 4A, “original model”). Although  
314 our hypothesis was indeed supported by localization data<sup>31</sup>, there has been no  
315 structural or biochemical evidence to support our proposed mechanism of motor-based  
316 inhibition of the tail domain. Thus, we wondered whether the HL3 insertion simply  
317

3

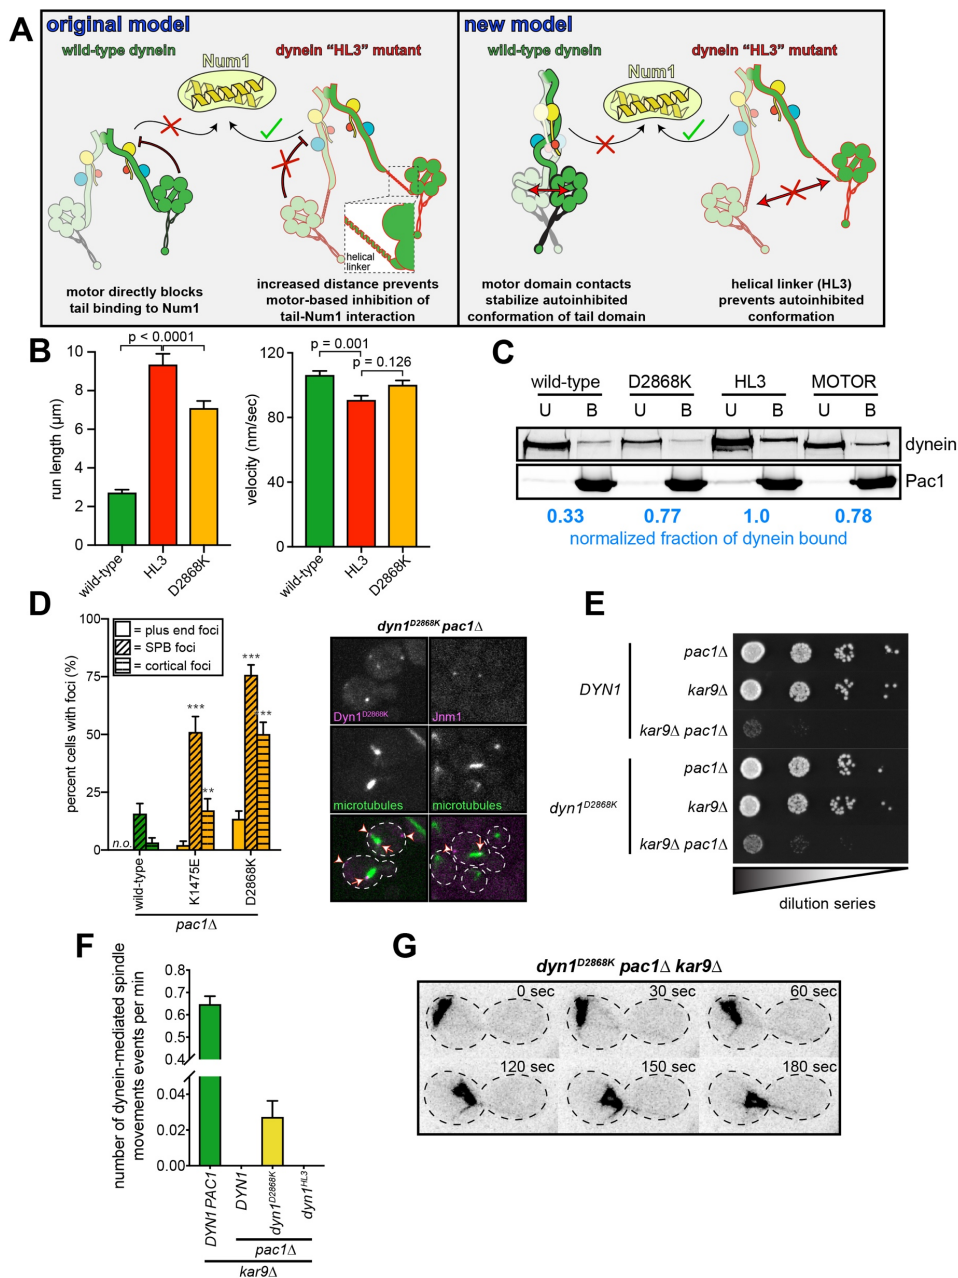

**Figure 4. Release of dynein autoinhibition permits Pac1/LIS1-independent localization and function.** (A) Cartoons depicting original, and new models accounting for “unmasking” phenotype observed with Dyn1<sup>HL3</sup> mutant<sup>31</sup>. Wild-type dynein tail domain is unable to associate with Num1 in the absence of plus end-targeting; however, addition of helical linker 3 (HL3) between tail and motor domains permits dynein to associate with Num1 independent of plus end-targeting. Our original model posited that this was a consequence of the motor domain directly precluding the tail domain from contact Num1; however, our new model is that contacts within the motor domain stabilize the phi particle conformation, in which the tail domains are in a twisted state that is unable to interact with Num1. In this latter model, insertion of HL3 prevents the adoption of the phi particle conformation. (B) Single molecule run length (from fitting of raw data to one-phase decay) and velocity values for wild-type and indicated mutant dyneins, as indicated, purified using plasmid-integration strategy described in Figure 1A ( $n \geq 224$  motors for each, from at least two independent experiments; error bars indicate standard error). Statistical significance was determined using a Mann-Whitney test (for run length) or with an unpaired Welch’s t test (for velocity). (C) Bead binding assay illustrating increased affinity of Pac1 for “open” dyneins (dynein<sup>D2868K</sup> and GST-dynein<sub>MOTOR</sub>). Purified dyneins were incubated with Pac1-FLAG-SNAP-decorated beads, and the bound (“B”) and unbound (“U”) fractions were resolved by SDS-PAGE. The normalized, relative bound and unbound fractions were determined by measuring band intensities. (D) Plot depicting the fraction of cells with indicated mutant or wild-type Dyn1 foci in *pac1* $\Delta$  cells ( $n \geq 34$  mitotic cells for each; “n.o.”, none observed; error bars indicate standard error of proportion). Representative fluorescence images depicting the presence of cortical dynein (Dyn1) and dynactin (Jnm1) in *dyn1*<sup>D2868K</sup> cells (arrowheads, cortical foci; arrows, SPB foci). Statistical significance was determined by calculating Z scores (\*\*,  $p = 0.011$ ; \*\*\*,  $p \leq 0.0001$ ). (E) Serial dilutions of cells with indicated genotype were plated on rich media (YPA supplemented with 2% glucose) and grown at 30°C for 2 days (as shown) or 4 days (see Fig. S3A). Note the partial rescue of cell viability in *kar9* $\Delta$  *pac1* $\Delta$  *dyn1*<sup>D2868K</sup> cells as compared to *DYN1* *kar9* $\Delta$  *pac1* $\Delta$  cells. (F) Plot depicting number of dynein-mediated spindle movements per cell per minute in hydroxyurea (HU)-arrested cells (all of which are *kar9* $\Delta$ ; see Methods;  $n \geq 32$  HU arrested cells for each). (G) Representative time-lapse fluorescence images of a hydroxyurea (HU)-arrested *dyn1*<sup>D2868K</sup> *pac1* $\Delta$  *kar9* $\Delta$  cell exhibiting a dynein-mediated spindle movement.



319 disrupts the phi particle conformation (Fig. 4A, “new model”), which would result in an  
320 enhanced interaction between dynein, dynactin and Num1.

321         Single molecule analysis of Dyn1<sub>HL3</sub> revealed that this mutant exhibits run  
322 lengths that exceed all other phi particle disrupting mutants (9.3  $\mu\text{m}$ ;  $p \leq 0.0001$ ),  
323 suggesting that HL3 peptide insertion indeed disrupts phi particle formation more than  
324 any of the single point mutants (Fig. 4B). Since we expressed the HL3 mutant complex  
325 using the strategy described in Figure 1, we compared its motility to similarly isolated  
326 wild-type and D2868K complexes. We noted that although dynein<sup>HL3</sup> and dynein<sup>D2868K</sup>  
327 exhibited significantly longer run lengths than wild-type dynein ( $p < 0.0001$ ), the  
328 overexpressed wild-type dynein complex exhibited slightly longer runs than the non-  
329 overexpressed complex (2.0  $\mu\text{m}$  versus 2.7  $\mu\text{m}$ ,  $p = 0.016$ ; see Fig. S2A). The same  
330 was not true for dynein<sup>D2868K</sup> (7.2  $\mu\text{m}$  for native, versus 7.3  $\mu\text{m}$  for overexpressed;  $p =$   
331 0.9488). This suggests that the phi particle conformation of the overexpressed dynein  
332 complex is more labile than the non-overexpressed complex. Consistent with this  
333 notion, the run length of the overexpressed wild-type complex – but not the one  
334 expressed from native promoters – increased over time to similar levels as the D2868K  
335 mutant, even when stored at  $-80^\circ\text{C}$  (Fig. S2; also see below). By comparison, we only  
336 observed a minor increase over time for the non-overexpressed wild-type complex, and  
337 for the overexpressed dynein<sup>D2868K</sup>. This is similar to observations with human dynein,  
338 which needs to be prepared fresh in order to obtain a sufficient proportion of phi  
339 particles<sup>7</sup>.

340         We previously noted that, like the truncated motor domain fragment<sup>48</sup> (both the  
341 monomeric<sup>48</sup> and artificially dimerized<sup>3</sup> variants) – which does not adopt the phi particle

342 conformation (see above) – the Dyn1<sub>HL3</sub> mutant exhibits higher affinity for Pac1 than  
343 wild-type dynein<sup>31</sup>. If this increased affinity is a consequence of Pac1 preferentially  
344 binding to an ‘open’, uninhibited dynein conformation, then we reasoned that a  
345 disrupted phi particle mutant would also exhibit higher affinity for Pac1 than wild-type  
346 dynein. To test this, we assessed the degree of dynein-Pac1 binding using a co-  
347 pelleting assay. Either wild-type or dynein<sup>D2868K</sup> was incubated with Pac1-FLAG-SNAP-  
348 decorated beads, and the bound and unbound fractions were quantitatively compared.  
349 As a control, we also included GST-dynein<sub>MOTOR</sub>, which we expected to exhibit high  
350 Pac1 affinity<sup>3,48</sup>. Consistent with the notion that Pac1 preferentially binds to dynein in its  
351 ‘open’, uninhibited conformation, we found that dynein<sup>D2868K</sup> and GST-dynein<sub>MOTOR</sub> both  
352 exhibited higher affinity for Pac1 than wild-type dynein (Fig. 4C). This also indicates that  
353 the likely reason for the altered localization<sup>31</sup> and single molecule behavior of dynein<sup>HL3</sup>  
354 is that it is in a constitutively uninhibited state.

355

### 356 **Disruption of the phi particle leads to Pac1-independent cortical dynein activity**

357       Given the phenotypic similarities between the phi particle disrupting mutants and  
358 Dyn1<sub>HL3</sub>, we wondered if the Pac1-independent cortical localization of Dyn1<sub>HL3</sub> is also a  
359 property of the phi-disrupting mutants. Specifically, we previously found that the HL3  
360 peptide insertion permits the dynein complex to bypass the need for Pac1 for delivery to  
361 cortical Num1 receptor sites<sup>31</sup>. To determine the role of Pac1 in localizing phi particle  
362 disrupting mutants to various sites in cells, we imaged Dyn1-3GFP (wild-type or mutant)  
363 in cells lacking Pac1 (*pac1Δ*). Consistent with prior observations<sup>44,48</sup>, Pac1 was required  
364 for normal plus end and cortical localization of wild-type dynein (Fig. 4D). This is

365 consistent with the offloading model for dynein function, in which dynein first associates  
366 with microtubule plus ends, from where it is delivered – or offloaded – to cortical Num1  
367 sites<sup>31,49</sup>. Surprisingly, both Dyn1<sup>K1475E</sup> and Dyn1<sup>D2868K</sup> were capable of localizing to the  
368 cell cortex in the absence of Pac1 (Fig. 4D). The frequency of Dyn1<sup>D2868K</sup> cortical  
369 localization in *pac1*Δ (50%) cells was similar to that of Dyn1<sup>HL3</sup> (as noted previously<sup>31</sup>,  
370 ~45% of cells exhibit cortical Dyn1<sup>HL3</sup> foci in *pac1*Δ cells).

371 We wondered if these Pac1-independent cortical pools of dynein were functional.  
372 To assess this, we performed a highly sensitive *in vivo* activity assessment, in which  
373 dynein-mediated spindle movements are visualized and quantitated<sup>5</sup>. To eliminate any  
374 dynein-independent contributions to spindle movements, these assays were performed  
375 in cells lacking Kar9, a protein that is required for an actin/myosin-mediated spindle  
376 orientation pathway<sup>50-52</sup>. Generation of yeast strains lacking Kar9 and dynein pathway  
377 components also permits a genetic assessment of dynein functionality. In particular,  
378 whereas cells deleted for either dynein or Kar9 pathway components exhibit no  
379 apparent growth phenotypes, combined deletion of any of the genes involved in these  
380 two pathways results in significant synthetic growth defects<sup>53</sup>. As shown in Figure 4E,  
381 combined deletion of Kar9 and Pac1 (*kar9*Δ *pac1*Δ) in cells expressing wild-type dynein  
382 leads to severe growth defects. Interestingly, *pac1*Δ *kar9*Δ cells expressing Dyn1<sup>D2868K</sup>  
383 exhibited growth defects less severe than those expressing wild-type dynein,  
384 suggesting that the D2868K mutation partly rescues the loss of Pac1 (Fig. 4E and Fig.  
385 S3A). Interestingly, we did not note a similar rescue for cells expressing Dyn1<sup>HL3</sup> (Fig.  
386 S3B), suggesting that, although this mutant can bypass Pac1 for cortical localization<sup>31</sup>,



387 and it is a highly processive motor *in vitro*, it is unable to move the mitotic spindle in  
388 cells.

389 Consistent with the need for Pac1 for cortical localization of wild-type dynein, we  
390 observed no dynein-mediated spindle movements in *pac1Δ kar9Δ* cells (Fig. 4F). As  
391 expected from the synthetic growth defects in *dyn1<sup>HL3</sup> kar9Δ* cells, we also observed no  
392 dynein-mediated spindle movements in these cells. Surprisingly, we did in fact observe  
393 dynein-mediated spindle movements in *dyn1<sup>D2868K</sup> kar9Δ pac1Δ* cells, indicating that the  
394 Pac1-independent cortical populations of the uninhibited dynein mutant are indeed  
395 active (Fig. 4F and G). Given the ability of the uninhibited dynein mutant to rescue the  
396 loss of Pac1, this suggests that at least one function of Pac1 is to release dynein from  
397 its autoinhibited phi particle conformation.

398

### 399 **Pac1 stabilizes the uninhibited conformation of motile dynein complexes**

400 To gain additional insight into the potential mechanism by which Pac1 may be  
401 affecting dynein autoinhibition we studied available structural information. Specifically,  
402 we focused on two structures: a monomeric yeast dynein motor domain bound to  
403 Pac1<sup>30</sup> (with Pac1 bound to a conserved site on the dynein motor domain<sup>26</sup>), and the  
404 human dynein complex in the autoinhibited state<sup>7</sup>. Docking of the Pac1-bound motor  
405 domain into one of the two motors in the autoinhibited state revealed an apparent steric  
406 clash between Pac1 and the motor domain to which Pac1 is not bound (Fig. 5A). This  
407 strongly suggests that a Pac1-bound dynein would be precluded from adopting the  
408 autoinhibited conformation. This also explains the enhanced affinity of Pac1 for the

409

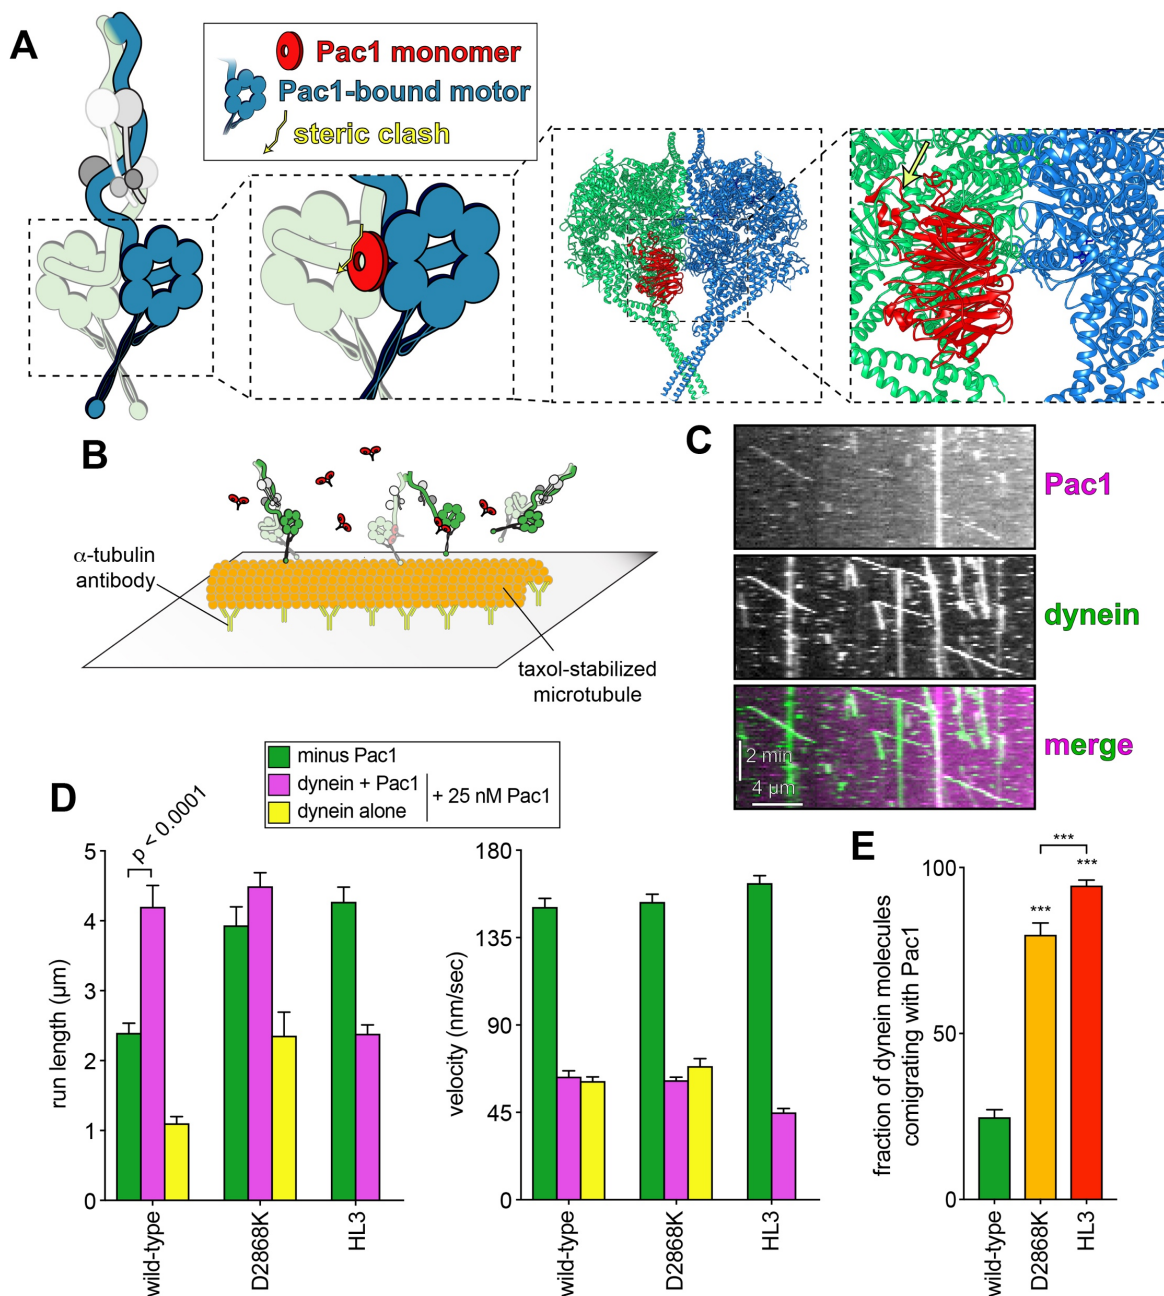

**Figure 5. Pac1 promotes release of the autoinhibited conformation of dynein.** (A) Cartoon and structural model depicting steric clash between phi particle dynein and Pac1. Structural model was generated by aligning the Pac1-bound dynein monomer structure (pdb 5VH9<sup>30</sup>) into one of the heavy chains in the phi particle structure (pdb 5NVU<sup>7</sup>). Note the steric clash (depicted with jagged yellow arrow) between the Pac1-bound dynein heavy chain (in blue) with the second heavy chain (in green). (B) Cartoon depicting experimental setup for dynein-Pac1 single molecule assay. (C) Representative kymograph illustrating comigrating dynein-Pac1 complexes in motility buffer supplemented with 150 mM potassium acetate (final concentration). (D) Plots depicting motility parameters (left, run length, from fitting of raw data to one-phase decay; right, velocity) of indicated dyneins moving in the absence (*i.e.*, those not pre-incubated with Pac1, green) or presence of 25 nM Pac1 (dimer concentration). For those experiments in which Pac1 and dynein were pre-incubated, we separately scored those dyneins comigrating with Pac1 (magenta), or migrating without Pac1 (yellow; between 134 - 664 dynein  $\pm$  Pac1 from at least two independent experiments were analyzed for each). To acquire movies of dynein alone, 1-second durations were used; however, for two-color dynein + Pac1 movies, we used 3 second durations due to the speed limitations of our microscope hardware. Statistical significance was determined using a Mann-Whitney test. (E) The fraction of dynein molecules migrating with Pac1 is plotted for the indicated dynein. Error bars depict standard error of proportion. Statistical significance was determined by calculating Z scores (unless indicated by brackets, asterisks indicate statistical difference from wild-type; \*\*\*,  $p < 0.0001$ ).

410 uninhibited dynein conformation, and also for a truncated dynein motor domain  
411 fragment (see Fig. 4C).

412       To directly test whether Pac1 could affect the conformational state of dynein, we  
413 sought to reassess the effect of Pac1 on dynein motility. In light of our single molecule  
414 motility data, we predicted that if Pac1 could promote release of dynein autoinhibition,  
415 then it would increase dynein run length. Previous studies describing the effect of Pac1  
416 on dynein motility<sup>28,29,31</sup> directly contrast with recent studies of human LIS1<sup>25-27</sup> (the  
417 human homolog of Pac1). Specifically, whereas Pac1 was shown to reduce dynein  
418 velocity and promote a microtubule-bound state<sup>28-30</sup>, LIS1 was shown to either increase  
419 the velocity of human dynein-dynactin complexes<sup>25,26</sup>, or have no effect on velocity<sup>27</sup>. In  
420 all these studies, LIS1 was observed comigrating with dynein-dynactin complexes at  
421 varying degrees. Thus, to clearly define how Pac1 affects dynein motility, we sought to  
422 specifically assess comigrating dynein-Pac1 complexes. However, unlike human LIS1<sup>25-</sup>  
423 <sup>27</sup>, we noted that even at nanomolar concentrations, Pac1 bound extensively along  
424 microtubules in our motility buffer (Fig. S4A; with 50 mM potassium acetate). We found  
425 that the Pac1-microtubule interaction was sensitive to ionic strength: whereas Pac1  
426 strongly bound microtubules in motility buffer supplemented 50 mM potassium acetate,  
427 it bound to a much lesser extent in 150 mM potassium acetate (Fig. S4A and B). Thus,  
428 we used these latter conditions to assess what effect Pac1 has on dynein motility (Fig.  
429 5B).

430       Two-color imaging of full-length, wild-type dynein preincubated with Pac1 in  
431 motility buffer supplemented with 150 mM potassium acetate revealed many instances  
432 of their comigration (Fig. 5C and E). From these movies, we separately scored the run

433 length and velocity values of those dynein molecules that comigrated with Pac1 (Fig.  
434 5D, magenta bars, “dynein + Pac1”), and those that moved without any apparent Pac1  
435 molecules (yellow bars, “dynein alone”). We noted that comigrating dynein-Pac1  
436 complexes moved with significantly longer run lengths than those dynein molecules that  
437 were not preincubated with Pac1 (4.2  $\mu\text{m}$  versus 2.4  $\mu\text{m}$ ;  $p < 0.0001$ ). The dynein-Pac1  
438 complexes also moved further than those dynein molecules that were not observed  
439 comigrating with Pac1 in the same imaging chamber (4.2  $\mu\text{m}$  versus 1.1  $\mu\text{m}$ ). Thus,  
440 Pac1 indeed promotes an uninhibited conformational state of motile dynein complexes.

441         If Pac1 increases run lengths of dynein as a consequence of it promoting an  
442 uninhibited state, then we reasoned that Pac1 would not do the same to uninhibited  
443 dynein mutants. Consistent with the enhanced affinity of Pac1 for these mutants (Fig.  
444 4C), we observed a much greater frequency of Pac1 molecules comigrating with  
445 dynein<sup>D2868K</sup> and dynein<sup>HL3</sup> (Fig. 5E). However, we noted no Pac1-dependent increase  
446 in run length for either of these mutants, further supporting the notion that they are already  
447 uninhibited. Note that the mean run length value for wild-type dynein with Pac1 (4.2  $\mu\text{m}$ )  
448 is almost identical to that for dynein<sup>D2868K</sup> with Pac1 (4.5  $\mu\text{m}$ ;  $p = 0.6187$ ), and dynein<sup>HL3</sup>  
449 alone (4.3  $\mu\text{m}$ ;  $p = 0.0620$ ), indicating these all represent similar degrees of uninhibited  
450 conformational states. As a side note, consistent with the labile nature of the phi particle  
451 conformation of the overexpressed wild-type dynein complex, we noted that the extent  
452 of its colocalization with Pac1 increased substantially over time (Fig. S2C and D). Taken  
453 together, these data indicate that Pac1 stabilizes the uninhibited conformational state of  
454 motile dynein complexes.

455  
456

457  
458  
459  
460  
461  
462  
463  
464  
465  
466  
467  
468  
469  
470  
471  
472  
473  
474  
475  
476  
477  
478  
479

### **Microtubule-bound Pac1 but not dynein-bound Pac1 reduces dynein velocity**

Given the wealth of information pertaining to the Pac1-dependent velocity reduction of dynein<sup>28,29,31</sup>, we sought to further address the underlying basis for this phenomenon. Given its propensity to bind microtubules in our motility buffer, we hypothesized that the Pac1-dependent reduction in dynein velocity is a direct consequence of its ability to bind microtubules (in a manner analogous to dynein velocity reduction by the microtubule-associated protein, She1<sup>54,55</sup>). Consistent with this possibility, structural analysis revealed that Pac1 contacts dynein at a region that is proximal to the microtubule surface ( $\leq 6.8$  nm; Fig. S5A and B; this does not take into account the unstructured E-hooks, which extend away from the surface). Our first clue that this may be the case came from separately analyzing dynein complexes that comigrated with Pac1 versus those that did not (Fig. 5D, yellow versus magenta bars). Given the low, but detectable prevalence of Pac1 along microtubules in these conditions (see Fig. S4A and B), motile dynein complexes still encounter microtubule-bound Pac1 during a processive run. We found that those dynein complexes that comigrated with Pac1 moved with a very similar reduction in velocity as those that did not (Fig. 5D;  $p = 0.5093$ ). Notably, those dynein complexes that did not comigrate with Pac1 exhibited run lengths somewhat lower than dynein molecules that moved in the absence of Pac1 (compare green and yellow bars). Thus, dynein velocity reduction occurs in a manner that is independent of being bound to Pac1 during a processive run, while processivity enhancement occurs in a manner that requires a stable interaction with Pac1.



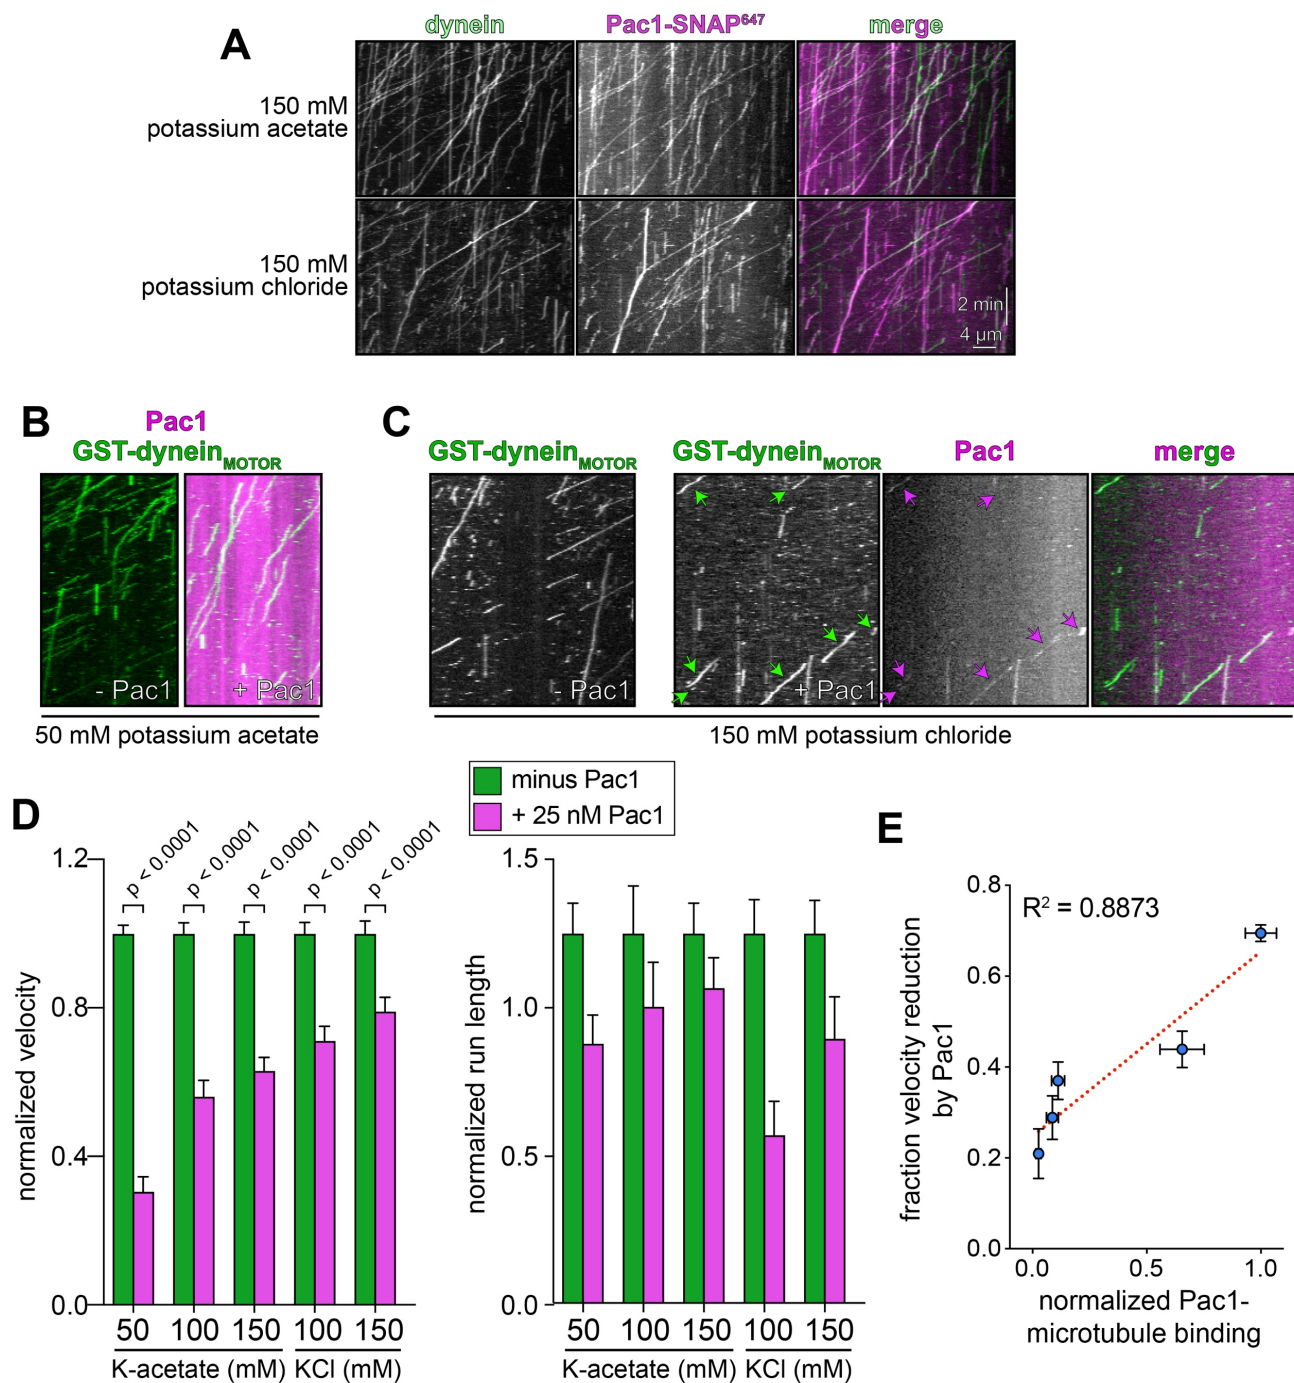

**Figure 6. Reducing Pac1-microtubule binding minimizes Pac1-mediated dynein velocity reduction.** (A) Representative kymographs depicting dynein<sup>D2868K</sup> and Pac1 comigrating in single molecule assay in buffers with increasing ionic strength, as indicated. Note that Pac1 and dynein still interact robustly in this assay in both buffer conditions (as apparent by a high degree of colocalization). (B and C) Representative kymographs depicting different motility characteristics of GST-dynein<sub>MOTOR</sub> in the presence of Pac1 when the latter is either extensively bound to the microtubule (B, in buffer supplemented with 50 mM potassium acetate), or to a much less extent (C, in buffer supplemented with 150 mM potassium chloride). (D) Plots depicting normalized motility parameters (left, normalized run length, from fitting of raw data to one-phase decay; right, normalized velocity) of GST-dynein<sub>MOTOR</sub> moving in the absence (green) or presence (magenta) of 25 nM Pac1 (dimer concentration; between 226 - 396 motors from two independent experiments were analyzed for each point). Error bars indicate standard error. (E) Plot depicting the relative degree of microtubule binding (normalized to 1; see Fig. S4B) versus the fraction velocity reduction of GST-dynein<sub>MOTOR</sub> by Pac1. The points (with error bars representing standard error) were fit to a linear regression that indicates a strong correlation between degree of Pac1-microtubule binding and Pac1-mediated dynein velocity reduction.

481 To further investigate the effect of Pac1 on dynein velocity, we sought to  
482 establish conditions in which Pac1-microtubule binding was further minimized. We  
483 found that motility buffer supplemented with 150 mM potassium chloride resulted in a  
484 much lower, although still somewhat detectable degree of Pac1-microtubule binding  
485 (Fig. S4A and B). Given the sensitivity of dynein microtubule binding and motility to high  
486 salt buffers<sup>56</sup>, we chose these conditions as an upper limit for ionic strength for our  
487 motility buffer. Importantly, when compared to buffer supplemented with 150 mM  
488 potassium acetate, buffer with 150 mM potassium chloride did not appear to negatively  
489 impact the Pac1-dynein interaction, as assessed from two-color imaging of dynein<sup>D2868K</sup>  
490 and Pac1 (Fig. 6A).

491 We next sought to correlate the degree of Pac1-mediated dynein velocity  
492 reduction to the extent of microtubule binding by Pac1. We used the GST-dynein<sub>MOTOR</sub>  
493 fragment which has been used extensively in prior Pac1 studies, and exhibits a strong  
494 velocity reduction phenotype in low ionic strength buffers<sup>28-30</sup>. As previously reported, 25  
495 nM Pac1 led to a strong (69.5%) reduction in velocity in the low ionic strength buffer (50  
496 mM potassium acetate; Fig. 6B and D, and Fig. S5C and D), in which Pac1 extensively  
497 binds along the microtubule lattice (Fig. S4A and B). However, as ionic strength was  
498 increased with either potassium acetate or potassium chloride, we noted the effect of  
499 Pac1 on GST-dynein<sub>MOTOR</sub> velocity was substantially reduced (Fig. 6C and D, and Fig.  
500 S4D, S5C and D). We plotted the degree of velocity reduction by Pac1 (as shown in Fig.  
501 6D) against the extent of Pac1-microtubule binding in each condition (as shown in Fig.  
502 S4B). Fitting these points to a linear regression revealed a very strong correlation  
503 between microtubule binding by Pac1 and its ability to affect dynein velocity (Fig. 6E;  $R^2$

504 = 0.8873). Thus, in contrast to processivity enhancement by Pac1 – which occurs in a  
505 manner that is independent of Pac1-microtubule binding – velocity reduction of dynein  
506 by Pac1 appears to occur only when Pac1 is bound to microtubules. Taken together,  
507 these findings support a model in which Pac1 is not in fact an inhibitor, but rather an  
508 activator of dynein (see Discussion).

## 509 510 **DISCUSSION**

511  
512 In summary, we have shown that like its human orthologue, yeast cytoplasmic  
513 dynein adopts an autoinhibited conformation. Furthermore, we have identified a clear  
514 biological relevance for this autoinhibited state. Specifically, the phi particle  
515 conformation plays a role in coordinating dynein localization and activity within the cell.  
516 This becomes abundantly clear in cells expressing uninhibited dynein mutants, which  
517 localize to microtubule plus ends and the cell cortex to a greater extent (the former due  
518 to an enhanced affinity for Pac1, and the latter due to increased dynactin binding).  
519 Moreover, our work identifies a novel role for Pac1 in regulating dynein autoinhibition.  
520 Our biochemical, single molecule, genetic, and cell biological data supported by  
521 structural analysis reveals the mechanism by which Pac1 modulates the equilibrium  
522 between the inhibited and uninhibited states of dynein (see below). Finally, our findings  
523 reveal that prior studies describing the role of Pac1 in effecting dynein velocity reduction  
524 are for the most part, if not entirely, a consequence of Pac1's ability to bind  
525 microtubules in low ionic strength buffers.

526 Based on our findings, we propose the following model for dynein function (see  
527 Figure 7): (1) Dynein stochastically switches between the inhibited and uninhibited  
528 conformational states. (2) Pac1 binds to dynein when it is in the uninhibited state, which



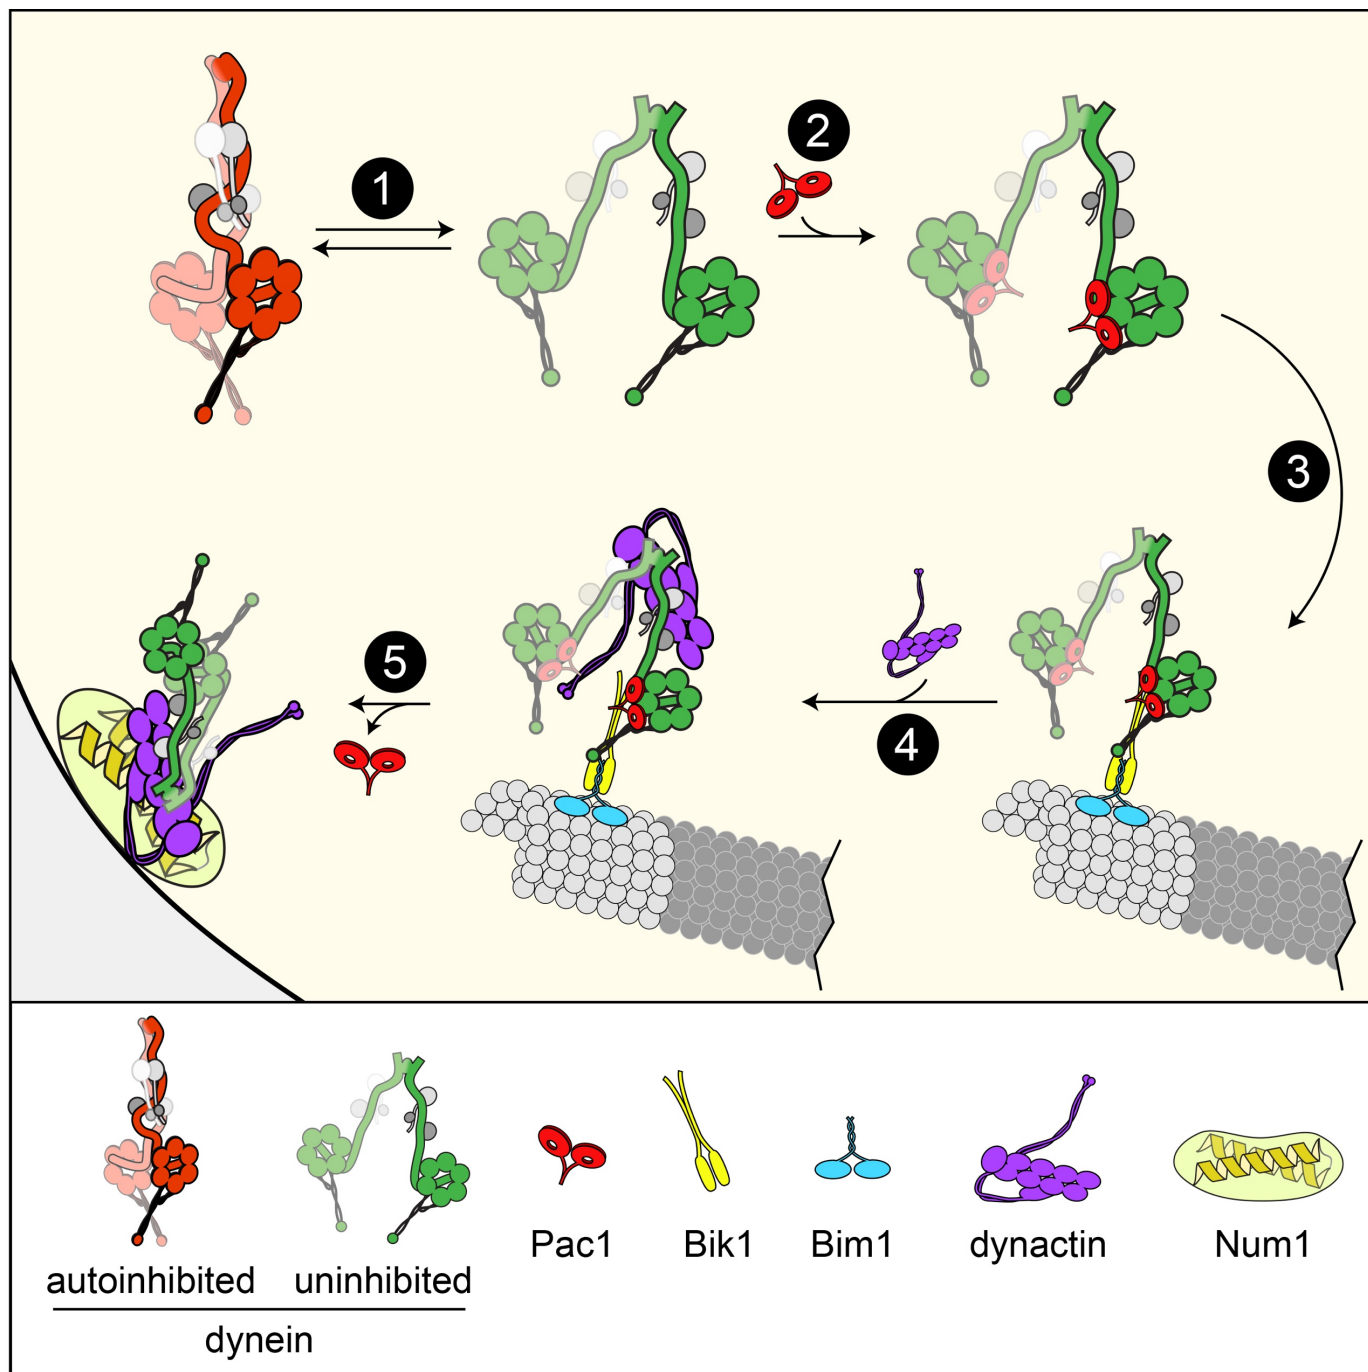

**Figure 7. Model for dynein and Pac1 activity in cells.** Our data support a model whereby dynein stochastically switches between open and closed states (step 1), the former of which is stabilized by Pac1 binding (step 2). The dynein-Pac1 complex associates with microtubule plus ends via direct interactions with Bik1 (step 3), which associates with plus ends by an unknown mechanism that may rely partly on Bim1. The plus end dynein-Pac1 complex associates with dynactin (step 4), which is then offloaded to cortical Num1 receptor sites (step 5). Given the lack of apparent Pac1 cortical foci, Pac1 likely dissociates either concomitant with, or subsequent to dynein-dynactin offloading.

530 consequently prevents dynein from switching to the autoinhibited conformation. (3) The  
531 Pac1-dynein complex associates with microtubule plus ends<sup>46</sup> due to their affinity for  
532 Bik1<sup>57</sup> (homolog of human CLIP-170), which associates with plus ends due in part to its  
533 interaction with Bim1<sup>58</sup> (homolog of human EB1). (4) As a consequence of it being in an  
534 uninhibited conformational state<sup>7</sup>, plus end-bound dynein interacts with dynactin. This  
535 interaction takes place in the absence of the presumed adaptor molecule, Num1<sup>47</sup>.  
536 Although dynein is likely in an open, uninhibited state at microtubule plus ends (due to  
537 the requisite presence of Pac1<sup>59</sup>), the precise configuration of the motor domains of this  
538 adaptor-free dynein-dynactin complex (which also occurs with human proteins<sup>25,27,60</sup>) is  
539 unclear. However, the fact that these complexes do not engage in minus end-directed  
540 motility – in either budding yeast<sup>47</sup>, or with reconstituted human proteins<sup>25,27,60</sup> –  
541 suggests that dynein is inactive at this site, despite being uninhibited. This lack of  
542 motility could be due in part to its strong affinity for proteins directly bound to the plus  
543 end, and/or due to the dynein heads not being appropriately arranged for proper motility  
544 (*i.e.*, in a parallel configuration), which has been observed for human dynein in complex  
545 with dynactin and the adaptor BicD2<sup>7</sup> (see below). (5) Upon encountering Num1 at the  
546 cell cortex, the dynein-dynactin complex is offloaded<sup>31</sup> and activated for motility<sup>47</sup>,  
547 possibly due to the arrangement of the motor heads in a parallel manner that is  
548 conducive for motility<sup>7</sup>. It is interesting to note that the HL3 mutant, which is our most  
549 processive motor in single molecule experiments (see Fig. 4B), is completely inactive in  
550 cells, as indicated by our cell biological data (see Fig. 4F). This could be a consequence  
551 of the helical linker disrupting the adoption of a parallel head configuration that is

552 potentially needed for cellular dynein-dynactin activity<sup>7</sup>. It also indicates that *in vitro*  
553 single molecule motility is not necessarily a good predictor of cellular activity.

554         Rather than acting as an inhibitor, our studies indicate that Pac1 in fact promotes  
555 cellular dynein activity by stabilizing the uninhibited conformational state (Fig. 7, step 2).  
556 Our data show that prior observations of a Pac1-mediated velocity reduction  
557 phenotype<sup>28-31</sup> are a consequence of the low ionic strength buffers used for these  
558 assays. Although we still observe a small effect of Pac1 on dynein velocity even at  
559 higher ionic strengths (21.0% reduction), this is likely due to residual microtubule-  
560 binding by Pac1 in the highest ionic strength buffer (see Fig. S4A, B and D). These data  
561 challenge the current model for Pac1 activity, whereby its binding to the motor domain  
562 sterically blocks dynein's mechanochemical cycle<sup>29</sup>. Our data indicate that Pac1 likely  
563 reduces dynein velocity in low ionic strength buffers *in vitro* by simply exerting drag on  
564 dynein via simultaneous contacts with dynein and the E-hooks of microtubules (see Fig.  
565 S4C and Fig. S5A and B), similar to prior observations with She1 on dynein motility<sup>54</sup>.  
566 Given the microtubule-binding-dependent effect of Pac1 on dynein velocity reduction,  
567 this raises the question of whether microtubule-binding by Pac1 is a relevant activity in  
568 live cells. Several lines of evidence indicate that this is likely not the case. Imaging of  
569 Pac1 in live cells reveals it only localizes to microtubule plus ends, and not along the  
570 microtubule lattice<sup>44,46,61</sup>. The interaction of Pac1 with microtubule plus ends is indirect  
571 (as depicted in Figure 7), as it relies on the presence of dynein<sup>46</sup> and the CLIP-170  
572 homolog, Bik1<sup>46,61</sup>. Finally, previous studies assessing the role of LIS1 in human dynein  
573 function have observed no microtubule-binding activity of LIS1<sup>25-27</sup>. In fact, in contrast to  
574 an inhibitory function, two of these studies observed a velocity increase in dynein-

575 dynactin-BicD2 motility due to LIS1<sup>25,26</sup>. Finally, a previous model describes Pac1  
576 inhibiting dynein release from microtubules as the mechanism by which it prevents  
577 dynein from walking away from the plus end<sup>28-30</sup>; however, in direct contradiction to this  
578 mode of action, the microtubule-binding domain of dynein is dispensable for its  
579 accumulation at microtubule plus ends<sup>47</sup>. In summary, we favor the hypothesis that  
580 Pac1 is an activator, not an inhibitor of dynein motility. This role is also supported by  
581 evidence in which overexpression of Pac1 leads to increased plus end and cortical  
582 localization of dynein, and increased cellular dynein activity<sup>46</sup>.

583         Although Pac1 is required for dynein localization and activity in cells expressing  
584 wild-type dynein, we show that this need for Pac1 can be bypassed when dynein  
585 autoinhibition is prevented by mutagenesis (e.g., K1475E and D2868K). This is also  
586 apparent by a partial rescue of synthetic growth defects in *kar9Δ pac1Δ* cells (see Fig.  
587 4E and Fig. S3A). This is additional support for a role for Pac1 in promoting an  
588 uninhibited dynein conformation. It is interesting to note that in spite of the high degree  
589 of cortical localization of the uninhibited dynein mutants in *pac1Δ* cells, these cells  
590 exhibit much fewer dynein-mediated spindle movements than wild-type cells (Fig. 4F).  
591 Thus, offloading of dynein to the cell cortex is more conducive to dynein activity than  
592 simple recruitment from the cytoplasm. Although the reasons for this are unclear, we  
593 propose that the offloading mechanism is optimally suited to maximize cortical dynein  
594 activity. Given the large surface area of the cell cortex (28  $\mu\text{m}^2$ ; assuming a sphere with  
595 a 3  $\mu\text{m}$  diameter) with respect to the small number of diffraction limited cortical dynein  
596 foci ( $\sim 0$ -2 foci in the daughter cell; e.g., Fig. 3C), the probability of one of the small  
597 number of astral microtubules ( $\sim 1$ -2 in the daughter cell) contacting a cortical dynein-

598 dynactin complex to initiate a spindle movement into the daughter cell is very low.  
599 However, if the microtubule delivers the motor that will subsequently transport it, the  
600 reliance on a stochastic search-based process to initiate a spindle movement event is  
601 eliminated. Analysis of dynein-mediated spindle movements in budding yeast revealed  
602 that approximately 40% of microtubule-cortex interactions lead to dynein-mediated  
603 spindle movements<sup>5</sup>, much greater than would be expected if the cell relied on a  
604 stochastic search-based process. Thus, by preventing direct recruitment from the  
605 cytoplasm, and requiring a plus end-mediated delivery mechanism, the phi particle, with  
606 support from Pac1, ensures that dynein-mediated spindle movements occur within a  
607 reasonable timeframe.

608         In addition to the phi particle restricting localization in cells, we also found that it  
609 plays a role in reducing processivity in an *in vitro* context. Given the high proportion of  
610 phi particles observed in our negative stain EM images (52.9% in phi conformation,  
611 versus 20.0% in an open state; Fig. S1), it is surprising that yeast dynein is processive  
612 at all. Our data indicate that yeast dynein stochastically switches from open to closed  
613 states in the middle of a processive run. Given the increased processivity of the  
614 uninhibited mutants, switching to a closed, inhibited state likely leads to termination of a  
615 run, which is likely due to a microtubule release event. This is consistent with the phi  
616 particle exhibiting lower affinity for microtubules than the open, uninhibited state<sup>7</sup>. Our  
617 findings also raise interesting questions regarding the distinct motility capabilities of  
618 yeast versus human dynein, the latter of which requires dynactin and an adaptor for  
619 processive single molecule motility<sup>1,2</sup>. In particular, why is yeast dynein processive  
620 without such factors, while human dynein is not? Cryo-EM data of human dynein in the

621 absence and presence of dynactin revealed that dynactin binding orients the motor  
622 domains in a parallel configuration, suggesting this is the key to dynactin-triggered  
623 processive motility<sup>7</sup>. It is possible that the motor domains of yeast dynein have a higher  
624 propensity to adopt a parallel configuration in the absence of dynactin binding; however,  
625 higher resolution structural data will be required to determine if this is indeed the case.

626         Although our work demonstrates a role for the phi particle in budding yeast  
627 dynein function, several lines of evidence indicate its importance in humans. For  
628 instance, a previous study showed that mutations that disrupt the human dynein phi  
629 particle lead to defects in dynein localization and function in human cells<sup>7</sup>. Similar to our  
630 observation that yeast dynein mutants localize to the SPBs to a greater extent, human  
631 dynein mutants localize more extensively to the spindle poles<sup>7</sup>. As further evidence for  
632 the importance of the autoinhibited conformation, at least three different mutations that  
633 map to the phi particle contact surfaces have been identified in patients suffering from  
634 neurological disease (*i.e.*, malformations in cortical development): E1518K, R1567Q,  
635 and R1603T<sup>62-64</sup> (equivalent to E1425, K1475, and K1510; see residues with “\*” in Fig.  
636 2A). We previously showed that a K1475Q dynein mutant exhibits phenotypes much  
637 like those described for K1475E (*i.e.*, increased single molecule run lengths and cortical  
638 localization), and leads to compromised dynein function in cells<sup>34</sup>. Thus, the phi particle  
639 is an important, highly conserved conformational state that is used by organisms  
640 throughout evolution to ensure appropriate dynein activity.

## 641 **AUTHOR CONTRIBUTIONS**

642  
643 S.M.M. and M.G.M. designed the study. M.G.M. performed the bulk of the *in vitro* and  
644 cellular assays, with some support from S.M.M. and J.M.G. The *in vitro* and cellular data

645 were analyzed by M.G.M. Negative staining, grid preparation and electron microscopy  
646 was performed by Garry P. Morgan at the University of Colorado Boulder Electron  
647 Microscopy facility. Single particle analysis was performed by S.M.M. with assistance  
648 from the EM facility support staff. Plasmids were generated by S.M.M. while yeast  
649 strains were generated by M.G.M. and J.M.G. The manuscript was written by S.M.M.  
650 with assistance from M.G.M.

651

## 652 **ACKNOWLEDGEMENTS**

653 We are grateful to Samara Reck-Peterson for the 8His-ZZ-Pac1-SNAP expressing  
654 yeast strain, and members of the Markus and DeLuca laboratories for valuable  
655 discussions. Electron microscopy was done at the University of Colorado, Boulder EM  
656 Services Core Facility in the MCDB Department, with the technical assistance of facility  
657 staff. This work utilized the RMACC Summit supercomputer, which is supported by the  
658 National Science Foundation (awards ACI-1532235 and ACI-1532236), the University of  
659 Colorado Boulder and Colorado State University. The RMACC Summit supercomputer  
660 is a joint effort of the University of Colorado Boulder and Colorado State University. We  
661 are also extremely grateful to Erin Osborne-Nishimura, David King, and Samuel  
662 Bowerman for their invaluable assistance with using software on Summit. This work was  
663 funded by the NIH/NIGMS (GM118492 to S.M.M.).

664

## 665 **METHODS**

### 666 ***Media and strain construction***



667 Strains are derived from either W303 or YEF473A<sup>65</sup> and are available upon  
668 request. We transformed yeast strains using the lithium acetate method<sup>66</sup>. Strains  
669 carrying mutations were constructed by PCR product-mediated transformation<sup>67</sup> or by  
670 mating followed by tetrad dissection. Proper tagging and mutagenesis was confirmed by  
671 PCR, and in most cases sequencing (all point mutations were confirmed via  
672 sequencing). Fluorescent tubulin-expressing yeast strains were generated using  
673 plasmids and strategies described previously<sup>68,69</sup>. Strains overexpressing the yeast  
674 dynein complex were generated by transforming p8His-ZZ-SNAPf-Dynein or p8His-ZZ-  
675 HALO-Dynein (wild-type or mutants) linearized by digestion with *Apal* (cuts within the  
676 *URA3* gene; see Fig. 1A). Integration was confirmed by PCR. Yeast synthetic defined  
677 (SD) media was obtained from Sunrise Science Products (San Diego, CA).

678

### 679 ***Plasmid generation***

680 For overexpression and purification of the yeast dynein complex (wild-type or  
681 mutants), we generated a polycistronic plasmid expressing all four dynein complex  
682 subunits using strategies analogous to the biGBAC assembly<sup>70</sup>. We first made a yeast  
683 expression "library" vector – pLIBy – which enables generation of a gene expression  
684 cassettes (GEC) with a strong, inducible *GAL1* promoter (*GAL1p*) on the 5' end, and a  
685 synthetic terminator sequence ( $T_{\text{synth3}}^{37}$ ) on the 3' end. A PCR product encompassing  
686 *GAL1p*, and an oligonucleotide containing  $T_{\text{synth3}}^{37}$  and a multicloning site (*XbaI*-*NotI*-  
687 *SpeI*-*BamHI*) were assembled into pRS305 digested with *BamHI* and *NotI* using Gibson  
688 assembly<sup>71</sup>, yielding pLIBy. We also generated a yeast genomic-integration vector with  
689 optimized linker sequences for Gibson assembly<sup>70</sup> flanked by *PmeI* restriction sites



690 (equivalent to pbiG1a and pbiG1b). These plasmids – pbiG1ay and pbiG1by– were  
691 generated by using Gibson assembly to insert a PCR product encompassing these  
692 elements from pbiG1a and pbiG1b<sup>70</sup> into pRS306. PCR products encompassing the  
693 *DYN2* (without the native intron), *DYN3* or *PAC11* open reading frames were  
694 assembled into pLIBy digested with BamHI and NotI. Subsequently, these GECs were  
695 amplified from each respective pLIBy vector using oligonucleotides that include regions  
696 for priming preceded on the 5' end by predefined “Cas” sequences<sup>70</sup>: the *DYN2* GEC  
697 was amplified with Cas $\alpha$ -forward and Cas $\beta$ -reverse; the *DYN3* GEC was amplified with  
698 Cas $\beta$ -forward and Cas $\gamma$ -reverse; and, the *PAC11* GEC was amplified with Cas $\gamma$ -forward  
699 and Cas $\omega$ -reverse. These three PCR products were assembled into pbiG1by digested  
700 with Swal to generate pbiG1by:*GAL1p:Dyn2::GAL1p:DYN3::GAL1p:PAC11*.

701 We generated pLIBy:*6His-StrepII-SNAPf-DYN1* using Gibson assembly.  
702 However, due to complications generating a PCR product from this vector, we chose to  
703 clone everything into this vector. We first substituted the LEU2 expression cassette in  
704 the pLIBy backbone with a URA3 marker by assembling a PCR product encompassing  
705 the URA3 cassette from pRS306 into pLIBy:*6His-StrepII-SNAPf-DYN1* digested with  
706 KsaI and AatII, yielding pLIBy:*6His-StrepII-SNAPf-DYN1::URA3*. To enable assembly of  
707 the *DYN2/DYN3/PAC11* polygene cassette into pLIBy:*6His-StrepII-SNAPf-*  
708 *DYN1::URA3*, we inserted the optimized “B” and “C” linker sequences for Gibson  
709 assembly<sup>70</sup> into this plasmid by assembling a PCR product encompassing “B”-PmeI  
710 site-“C” into pLIBy:*6His-StrepII-SNAPf-DYN1::URA3* digested with KpnI and Sall.  
711 Subsequent to digestion with PmeI, this plasmid was assembled with the PmeI  
712 restriction digest product from pbiG1by:*GAL1p:Dyn2::GAL1p:DYN3::GAL1p:PAC11*

713 (encompassing *GAL1p:Dyn2::GAL1p:DYN3::GAL1p:PAC11*), yielding pLIBy:  
714 *GAL1p:Dyn2::GAL1p:DYN3::GAL1p:PAC11::GAL1p:6His-StrepII-SNAPf-Dyn1::URA3*,  
715 hereafter referred to as p6His-StrepII-SNAPf-Dynein. Prior to using this plasmid for pilot  
716 tests, we decided to swap the 6His-StrepII affinity tag for an 8His-ZZ tag (followed by a  
717 tandem TEV protease recognition site). We did this by assembling a PCR product  
718 encompassing 8His-ZZ into p6His-StrepII-SNAPf-Dynein digested with AatII and XhoI,  
719 yielding p8His-ZZ-SNAPf-Dynein. We replaced the SNAPf tag with a HALO tag using a  
720 similar strategy, yielding p8His-ZZ-HALO-Dynein. All mutations were engineered into  
721 these plasmids using common strategies.

722

### 723 **Protein purification**

724 Purification of Pac1-FLAG-SNAP was performed as previously described<sup>28</sup>.  
725 Purification of yeast dynein (ZZ-TEV-Dyn1-HALO, under the native *DYN1* promoter; or,  
726 ZZ-TEV-HALO-(or SNAPf)-Dynein, with all genes under control of the *GAL1p* promoter;  
727 or, ZZ-TEV-6His-GFP-3HA-GST-dynein<sub>MOTOR</sub>-HALO, under the control of the *GAL1p*  
728 promoter) was performed as previously described with minor modifications used for the  
729 overexpressed complex<sup>28,54</sup>. Briefly, yeast cultures were grown in YPA supplemented  
730 with either 2% glucose (for non-overexpressed full-length dynein) or 2% galactose (for  
731 the *GAL1p*-inducible strains), harvested, washed with cold water, and then resuspended  
732 in a small volume of water. The resuspended cell pellet was drop frozen into liquid  
733 nitrogen and then lysed in a coffee grinder (Hamilton Beach). For most purifications  
734 (with exception of those used for negative stain/EM imaging) we used the following  
735 procedure: after lysis, 0.25 volume of 4X dynein lysis buffer (1X buffer: 30 mM HEPES,

736 pH 7.2, 50 mM potassium acetate, 2 mM magnesium acetate, 0.2 mM EGTA)  
737 supplemented with 1 mM DTT, 0.1 mM Mg-ATP, 0.5 mM Pefabloc SC (concentrations  
738 for 1X buffer) was added, and the lysate was clarified at 22,000 x g for 20 min. The  
739 supernatant was then bound to IgG sepharose 6 fast flow resin (GE) for 1-1.5 hours at  
740 4°C, which was subsequently washed three times in 5 ml lysis buffer, and twice in TEV  
741 buffer (50 mM Tris, pH 8.0, 150 mM potassium acetate, 2 mM magnesium acetate, 1  
742 mM EGTA, 0.005% Triton X-100, 10% glycerol, 1 mM DTT, 0.1 mM Mg-ATP, 0.5 mM  
743 Pefabloc SC). To fluorescently label the motors for single molecule analyses, the bead-  
744 bound protein was incubated with either 6.7  $\mu$ M HaloTag-AlexaFluor660 or HaloTag-  
745 TMR (Promega), or SNAP-Surface Alex Fluor 647 (NEB), as appropriate, for 10-20  
746 minutes at room temperature. The resin was then washed four more times in TEV  
747 digest buffer, then incubated in TEV buffer supplemented with TEV protease for 1-1.5  
748 hours at 16°C. Following TEV digest, the beads were pelleted, and the resulting  
749 supernatant was aliquoted, flash frozen in liquid nitrogen, and stored at -80°C. Protein  
750 preparations used for negative stain/EM imaging were subject to tandem affinity  
751 purification. To do so, subsequent to lysis, 0.25 volume of 4X NiNTA dynein lysis buffer  
752 (1X buffer: 30 mM HEPES, pH 7.2, 200 mM potassium acetate, 2 mM magnesium  
753 acetate, 10% glycerol) supplemented with 1 mM beta-mercaptoethanol, 0.1 mM Mg-  
754 ATP, 0.5 mM Pefabloc SC (concentrations for 1X buffer) was added, and the lysate was  
755 clarified as above. The supernatant was then bound to NiNTA agarose for 1 hour at  
756 4°C, which was subsequently washed three times in 5 ml NiNTA lysis buffer. The  
757 protein was eluted in NiNTA lysis buffer supplemented with 250 mM imidazole by  
758 incubation for 10 minutes on ice. The eluate was then diluted with an equal volume of

759 dynein lysis buffer, which was then incubated with IgG sepharose 6 fast flow resin for 1  
760 hour at 4°C. The beads were washed and the protein was eluted as described above.  
761 Eluted protein was either applied to a size exclusion resin (Superose 6; GE), or snap  
762 frozen. The gel filtration resin was equilibrated in GF150 buffer (25 mM HEPES pH 7.4,  
763 150 mM KCl, 1 mM MgCl<sub>2</sub>, 5 mM DTT, 0.1 mM Mg-ATP) using an AKTA Pure. Peak  
764 fractions (determined by UV 260 nm absorbance and SDS-PAGE) were pooled,  
765 concentrated, aliquoted, flash frozen, then stored at -80°C.

766         For comparison of elution profiles between yeast and human dynein complexes,  
767 the human dynein complex was expressed and purified from insect cells (ExpiSf9 cells;  
768 Life Technologies) as previously described with minor modifications<sup>1,7</sup>. Briefly, 4 ml of  
769 ExpiSf9 cells at 2.5 x 10<sup>6</sup> cells/ml, which were maintained in ExpiSf CD Medium (Life  
770 Technologies), were transfected with 1 µg of bacmid DNA (see above) using  
771 ExpiFectamine (Life Technologies) according to the manufacturer's instructions. 5 days  
772 following transfection, the cells were pelleted, and 1 ml of the resulting supernatant (P1)  
773 was used to infect 300 ml of ExpiSf9 cells (5 x 10<sup>6</sup> cells/ml). 72 hours later, the cells  
774 were harvested (2000 x g, 20 min), washed with phosphate buffered saline (pH 7.2),  
775 pelleted again (1810 x g, 20 min), and resuspended in an equal volume of human  
776 dynein lysis buffer (50 mM HEPES, pH 7.4, 100 mM NaCl, 10% glycerol, 1 mM DTT,  
777 0.1 mM Mg-ATP, 1 mM PMSF). The resulting cell suspension was drop frozen in liquid  
778 nitrogen and stored at -80°C. For protein purification, 30 ml of additional human dynein  
779 lysis buffer supplemented with cOmplete protease inhibitor cocktail (Roche) was added  
780 to the frozen cell pellet, which was then rapidly thawed in a 37°C water bath prior to  
781 incubation on ice. Cells were lysed in a dounce-type tissue grinder (Wheaton) using

782  $\geq 150$  strokes (lysis was monitored by microscopy). Subsequent to clarification at  
783 22,000 x g, 45 min, the supernatant was applied to 2 ml of IgG sepharose fast flow resin  
784 pre-equilibrated in human dynein lysis buffer, and incubated at 4°C for 2-4 hours. Beads  
785 were then washed with 50 ml of human dynein lysis buffer, and 50 ml of human dynein  
786 TEV buffer (50 mM Tris pH 7.4, 150 mM potassium acetate, 2 mM magnesium acetate,  
787 1 mM EGTA, 10% glycerol, 1 mM DTT, 0.1 mM Mg-ATP). The bead-bound protein was  
788 eluted with by incubation with TEV protease overnight at 4°C. The next morning, the  
789 recovered supernatant was applied to a Superose 6 gel filtration column as above.

790

### 791 ***Single molecule motility assays***

792 The yeast dynein single-molecule motility assay was performed as previously  
793 described with minor modifications<sup>54</sup>. Briefly, flow chambers constructed using slides  
794 and plasma cleaned and silanized coverslips attached with double-sided adhesive tape  
795 were coated with anti-tubulin antibody (8  $\mu$ g/ml, YL1/2; Accurate Chemical & Scientific  
796 Corporation) then blocked with 1% Pluronic F-127 (Fisher Scientific). Taxol-stabilized  
797 microtubules assembled from unlabeled and fluorescently-labeled porcine tubulin (10:1  
798 ratio; Cytoskeleton) were introduced into the chamber. Following a 5-10 minute  
799 incubation, the chamber was washed with dynein lysis buffer (see above) supplemented  
800 with 20  $\mu$ M taxol. Subsequently, purified dynein motors diluted in motility buffer (30 mM  
801 HEPES pH 7.2, 2 mM magnesium acetate, 1 mM EGTA, 1 mM DTT, 1 mM Mg-ATP,  
802 0.05% Pluronic F-127, 20  $\mu$ M taxol, and an oxygen-scavenging system consisting of  
803 1.5% glucose, 1 U/ml glucose oxidase, 125 U/ml catalase) supplemented with either 50

804 mM potassium acetate, or as indicated in figure legend, were introduced in the  
805 chamber, and imaged.

806 To image comigrating Pac1-dynein complexes, 500 nM Pac1-SNAP<sup>647</sup> (dimer  
807 concentration) and ~50 nM HALO<sup>TMR</sup>-Dynein were preincubated on ice for 10-15  
808 minutes prior to a 20-fold dilution into modified motility buffer (30 mM HEPES pH 7.2, 2  
809 mM magnesium acetate, 1 mM EGTA, 1 mM DTT, 1 mM Mg-ATP) supplemented with  
810 potassium acetate or potassium chloride as indicated in figure legends, 0.05% Pluronic  
811 F-127, 20  $\mu$ M taxol, and an oxygen-scavenging system (as above). The higher yield  
812 overexpressed dynein complex was needed for these assays given the low landing rate  
813 of dynein in the higher ionic strength buffers. We ensured that comigrating Pac1-  
814 SNAP<sup>647</sup> spots were not due to bleed-through from the HALO<sup>TMR</sup>-dynein channel by  
815 performing two-color imaging with HALO<sup>TMR</sup>-dynein alone (no spots were apparent in  
816 the far-red channel in these cases).

817 TIRFM images were collected using a 1.49 NA 100X TIRF objective on a Nikon  
818 Ti-E inverted microscope equipped with a Ti-S-E motorized stage, piezo Z-control  
819 (Physik Instrumente), and an iXon X3 DU897 cooled EM-CCD camera (Andor). 488 nm,  
820 561 nm, and 640 nm lasers (Coherent) were used along with a multi-pass quad filter  
821 cube set (C-TIRF for 405/488/561/638 nm; Chroma) and emission filters mounted in a  
822 filter wheel (525/50 nm, 600/50 nm and 700/75 nm; Chroma). We acquired images at 1,  
823 2, or 3 second intervals for 8-10 min. Velocity and run length values were determined  
824 from kymographs generated using the MultipleKymograph plugin for ImageJ  
825 ([http://www.embl.de/eamnet/html/body\\_kymograph.html](http://www.embl.de/eamnet/html/body_kymograph.html)). Those motors that moved for  
826  $\geq 3$  time points were measured.



827

## 828 **Negative stain electron microscopy and image analysis**

829 EM grids were prepared with a standard negative stain protocol by applying fresh  
830 dynein samples to glow discharged carbon coated 200 mesh copper grids. After ~1  
831 minute incubation, 2% uranyl acetate was added. 1600 micrographs were collected on a  
832 FEI Tecnai F20 200kV TEM equipped with a Gatan US4000 CCD (model 984), at a  
833 nominal magnification of 90,000X with the digital pixel size 6.19 angstroms. All image  
834 analysis was performed in Relion 3.0 on the University of Colorado Boulder High  
835 Performance Computer Cluster, Summit. Particles were manually picked from ~20  
836 micrographs (~200 particles), which were used to generate a low resolution 2D class  
837 average. Using these 2D averages as a starting point, we then used an iterative  
838 process to autopick particles that were used to generate our final 2D averages, and for  
839 3D model building (in total, 42,611 particles were used for final averages shown in  
840 Figure 1D).

841

## 842 ***Live cell imaging experiments***

843 For the spindle dynamics assay, cells were arrested with hydroxyurea (HU) for  
844 2.5 hours, and then mounted on agarose pads containing HU for fluorescence  
845 microscopy. Full Z-stacks (23 planes with 0.2  $\mu\text{m}$  spacing) of GFP-labeled microtubules  
846 (GFP-Tub1) were acquired every 10 seconds for 10 minutes on a stage prewarmed to  
847 30°C. To image dynein localization in live cells, cells were grown to mid-log phase in SD  
848 media supplemented with 2% glucose, and mounted on agarose pads. Images were  
849 collected on a Nikon Ti-E microscope equipped with a 1.49 NA 100X TIRF objective, a

850 Ti-S-E motorized stage, piezo Z-control (Physik Instrumente), an iXon DU888 cooled  
851 EM-CCD camera (Andor), a stage-top incubation system (Okolab), and a spinning disc  
852 confocal scanner unit (CSUX1; Yokogawa) with an emission filter wheel (ET480/40m for  
853 mTurquoise2, ET525/50M for GFP, and ET632/60M for mRuby2; Chroma). Lasers (445  
854 nm, 488 nm and 561 nm) housed in a LU-NV laser unit equipped with AOTF control  
855 (Nikon) were used to excite mTurquoise2, GFP and mRuby2, respectively. The  
856 microscope was controlled with NIS Elements software (Nikon).

857

### 858 ***Statistical analyses***

859 Statistical tests were performed as described in the figure legends. T-tests were  
860 performed using Graphpad Prism. Z scores were calculated using the following formula:

$$861 \quad Z = \frac{(\hat{p}_1 - \hat{p}_2)}{\hat{p}(1 - \hat{p}) \left( \frac{1}{n_1} + \frac{1}{n_2} \right)}$$

862 where:

$$863 \quad \hat{p} = \frac{y_1 + y_2}{n_1 + n_2}$$

864 Z scores were converted to two-tailed P values using an online calculator.

865

### 866 ***Data availability***

867 All yeast strains, and datasets generated during and/or analysed during the  
868 current study are available from the corresponding author upon request.

869

## 870 **FIGURE LEGENDS**

871 **Figure 1. The yeast dynein complex adopts an autoinhibited phi particle**  
872 **conformation.** (A) Schematic of the polycistronic plasmid used to produce the intact  
873 yeast dynein complex. Restriction digest with Apal (cuts within *URA3* gene) targets the  
874 plasmid for homologous recombination into the *ura3-1* locus as depicted. (B)  
875 Representative kymograph depicting single molecule motility of the purified  
876 overexpressed yeast dynein complex. (C) Elution profiles of yeast and human dynein  
877 complexes from Superose 6 resin (left), and scans of the same polyacrylamide gel  
878 depicting fluorescently labeled Dyn1 (via HaloTag-TMR) and the entire complex (via  
879 Sypro Ruby staining; right). (D) Representative negative stain EM class averages of the  
880 intact yeast dynein complex. Number of particles used to generate each class indicated  
881 in each panel. Classes i – vi depict dynein in the autoinhibited, phi particle conformation,  
882 whereas vii – x depict dynein in various open, uninhibited states. (E) 3D models of  
883 dynein in the autoinhibited state generated from 2D class averages with (right) and  
884 without (left) a high resolution 3D structure of human dynein-1 in the phi particle  
885 conformation (pdb 5NVU) manually docked into it. Note that the structures of the two tail  
886 domains have been slightly rotated with respect to the motor domains to better fit the 3D  
887 model, and that the structures of both TcTEX and Robl have been eliminated due to  
888 their absence from the yeast dynein complex. Also see Video S1.

889

890 **Figure 2. Disrupting phi particle contact points extends single molecule run**  
891 **lengths.** (A) Cartoon depicting four predicted intermolecular contact surfaces within the  
892 motor domains that stabilize the phi particle conformation. Four insets show respective  
893 regions of yeast dynein modeled into human dynein phi particle structure. Structural

894 models were generated using one-to-one threading of the yeast *DYN1* sequence into  
895 5NVU<sup>7</sup> on the Phyre2 server<sup>72</sup>. Residues with magenta asterisks are mutated in patients  
896 suffering from neurological disease<sup>62-64</sup> (see Discussion). (B) Single molecule run length  
897 (from fitting of raw data to one-phase decay) and velocity values for wild-type and  
898 mutant dyneins with phi particle disrupting mutations (at surfaces 2, 3 and 4, as  
899 indicated). Cartoons along vertical axis depict electrostatic interactions (or lack thereof)  
900 among residues 1517, 1475 (left circles) and 2868 (right circle) at linker-AAA4 surface.  
901 Note that the degree of processivity enhancement is inversely proportional to the  
902 number of charge interactions at this surface. Error bars indicate standard error  
903 (between 150 - 528 motors from at least two independent experiments were analyzed  
904 for each). Statistical significance was determined using a Mann-Whitney test (for run  
905 length) or with an unpaired Welch's t test (two-tailed; for velocity; \*\*\*,  $p \leq 0.0001$ ). Also  
906 note that we generated and tested the motility of two other point mutants at interface 3,  
907 E3441K and R3445D, both of which were inactive in single molecule assays (not  
908 shown).

909

910 **Figure 3. The autoinhibited conformation restricts plus end and cortical**

911 **localization of dynein.** (A) Cartoon depicting the two main sites of dynein localization  
912 (microtubule plus ends, and cell cortex), and the molecular requirements for each.  
913 Dynein plus end localization (1) requires Bik1<sup>57</sup> and Pac1<sup>44</sup>, with Bim1 potentially  
914 playing some role in this process, but does not require dynactin<sup>4</sup>. Rather, dynactin plus  
915 end localization (2) relies on dynein<sup>4</sup>. Subsequent to plus end targeting, dynein-dynactin  
916 complexes are offloaded to cortical Num1 sites<sup>31,73</sup> (3). (B) Plot depicting the frequency

917 of plus end, SPB (spindle pole body) and cortical targeting for wild-type and mutant  
918 Dyn1 ( $n \geq 32$  mitotic cells for each). Error bars indicate standard error of proportion.  
919 Statistical significance was determined by calculating Z scores (see Methods). (C)  
920 Representative images of wild-type or mutant dynein (D2868K) localizing in otherwise  
921 wild-type or *nip100* $\Delta$  (dynactin component) cells. Note the lack of cortical localization of  
922 Dyn1<sup>D2868K</sup> in *nip100* $\Delta$  cells (white arrowheads, cortical foci; white arrows, plus end foci;  
923 blue arrowheads, SPB foci).

924  
925 **Figure 4. Release of dynein autoinhibition permits Pac1/LIS1-independent**  
926 **localization and function.** (A) Cartoons depicting original, and new models accounting  
927 for “unmasking” phenotype observed with Dyn1<sup>HL3</sup> mutant<sup>31</sup>. Wild-type dynein tail  
928 domain is unable to associate with Num1 in the absence of plus end-targeting; however,  
929 addition of helical linker 3 (HL3) between tail and motor domains permits dynein to  
930 associate with Num1 independent of plus end-targeting. Our original model posited that  
931 this was a consequence of the motor domain directly precluding the tail domain from  
932 contact Num1; however, our new model is that contacts within the motor domain  
933 stabilize the phi particle conformation, in which the tail domains are in a twisted state  
934 that is unable to interact with Num1. In this latter model, insertion of HL3 prevents the  
935 adoption of the phi particle conformation. (B) Single molecule run length (from fitting of  
936 raw data to one-phase decay) and velocity values for wild-type and indicated mutant  
937 dyneins, as indicated, purified using plasmid-integration strategy described in Figure 1A  
938 ( $n \geq 224$  motors for each, from at least two independent experiments; error bars indicate  
939 standard error). Statistical significance was determined using a Mann-Whitney test (for

940 run length) or with an unpaired Welch's t test (two-tailed; for velocity). (C) Bead binding  
941 assay illustrating increased affinity of Pac1 for "open" dyneins (dynein<sup>D2868K</sup> and GST-  
942 dynein<sub>MOTOR</sub>). Purified dyneins were incubated with Pac1-FLAG-SNAP-decorated  
943 beads, and the bound ("B") and unbound ("U") fractions were resolved by SDS-PAGE.  
944 The normalized, relative bound and unbound fractions were determined by measuring  
945 band intensities. (D) Plot depicting the fraction of cells with indicated mutant or wild-type  
946 Dyn1 foci in *pac1Δ* cells ( $n \geq 34$  mitotic cells for each; "n.o.", none observed; error bars  
947 indicate standard error of proportion). Representative fluorescence images depicting the  
948 presence of cortical dynein (Dyn1) and dynactin (Jnm1) in *dyn1<sup>D2868K</sup>* cells (arrowheads,  
949 cortical foci; arrows, SPB foci). Statistical significance was determined by calculating Z  
950 scores (\*\*,  $p = 0.011$ ; \*\*\*,  $p \leq 0.0001$ ). (E) Serial dilutions of cells with indicated  
951 genotype were plated on rich media (YPA supplemented with 2% glucose) and grown at  
952 30°C for 2 days (as shown) or 4 days (see Fig. S3A). Note the partial rescue of cell  
953 viability in *kar9Δ pac1Δ dyn1<sup>D2868K</sup>* cells as compared to *DYN1 kar9Δ pac1Δ* cells. (F)  
954 Plot depicting number of dynein-mediated spindle movements per cell per minute in  
955 hydroxyurea (HU)-arrested cells (all of which are *kar9Δ*; see Methods;  $n \geq 32$  HU  
956 arrested cells for each). (G) Representative time-lapse fluorescence images of a  
957 hydroxyurea (HU)-arrested *dyn1<sup>D2868K</sup> pac1Δ kar9Δ* cell exhibiting a dynein-mediated  
958 spindle movement.

959

960 **Figure 5. Pac1 promotes release of the autoinhibited conformation of dynein.** (A)  
961 Cartoon and structural model depicting steric clash between phi particle dynein and  
962 Pac1. Structural model was generated by aligning the Pac1-bound dynein monomer



963 structure (pdb 5VH9<sup>30</sup>) into one of the heavy chains in the phi particle structure (pdb  
964 5NVU<sup>7</sup>). Note the steric clash (depicted with jagged yellow arrow) between the Pac1-  
965 bound dynein heavy chain (in blue) with the second heavy chain (in green). (B) Cartoon  
966 depicting experimental setup for dynein-Pac1 single molecule assay. (C)  
967 Representative kymograph illustrating comigrating dynein-Pac1 complexes in motility  
968 buffer supplemented with 150 mM potassium acetate (final concentration). (D) Plots  
969 depicting motility parameters (left, run length, from fitting of raw data to one-phase  
970 decay; right, velocity) of indicated dyneins moving in the absence (*i.e.*, those not pre-  
971 incubated with Pac1, green) or presence of 25 nM Pac1 (dimer concentration). For  
972 those experiments in which Pac1 and dynein were pre-incubated, we separately scored  
973 those dyneins comigrating with Pac1 (magenta), or migrating without Pac1 (yellow;  
974 between 134 - 664 dynein  $\pm$  Pac1 from at least two independent experiments were  
975 analyzed for each). To acquire movies of dynein alone, 1-second durations were used;  
976 however, for two-color dynein + Pac1 movies, we used 3 second durations due to the  
977 speed limitations of our microscope hardware. Statistical significance was determined  
978 using a Mann-Whitney test. (E) The fraction of dynein molecules migrating with Pac1 is  
979 plotted for the indicated dynein. Error bars depict standard error of proportion. Statistical  
980 significance was determined by calculating Z scores (unless indicated by brackets,  
981 asterisks indicate statistical difference from wild-type; \*\*\*,  $p < 0.0001$ ; \*\*,  $p = 0.0011$ ).

982

983 **Figure 6. Reducing Pac1-microtubule binding minimizes Pac1-mediated dynein**  
984 **velocity reduction.** (A) Representative kymographs depicting dynein<sup>D2868K</sup> and Pac1  
985 comigrating in single molecule assay in buffers with increasing ionic strength, as

986 indicated. Note that Pac1 and dynein still interact robustly in this assay in both buffer  
987 conditions (as apparent by a high degree of colocalization). (B and C) Representative  
988 kymographs depicting different motility characteristics of GST-dynein<sub>MOTOR</sub> in the  
989 presence of Pac1 when the latter is either extensively bound to the microtubule (B, in  
990 buffer supplemented with 50 mM potassium acetate), or to a much less extent (C, in  
991 buffer supplemented with 150 mM potassium chloride). (D) Plots depicting normalized  
992 motility parameters (left, normalized run length, from fitting of raw data to one-phase  
993 decay; right, normalized velocity) of GST-dynein<sub>MOTOR</sub> moving in the absence (green) or  
994 presence (magenta) of 25 nM Pac1 (dimer concentration; between 226 - 396 motors  
995 from two independent experiments were analyzed for each point). Error bars indicate  
996 standard error. (E) Plot depicting the relative degree of microtubule binding (normalized  
997 to 1; see Fig. S4B) versus the fraction velocity reduction of GST-dynein<sub>MOTOR</sub> by Pac1.  
998 The points (with error bars representing standard error) were fit to a linear regression  
999 that indicates a strong correlation between degree of Pac1-microtubule binding and  
1000 Pac1-mediated dynein velocity reduction.

1001  
1002 **Figure 7. Model for dynein and Pac1 activity in cells.** Our data support a model  
1003 whereby dynein stochastically switches between open and closed states (step 1), the  
1004 former of which is stabilized by Pac1 binding (step 2). The dynein-Pac1 complex  
1005 associates with microtubule plus ends via direct interactions with Bik1 (step 3), which  
1006 associates with plus ends by an unknown mechanism that may rely partly on Bim1. The  
1007 plus end dynein-Pac1 complex associates with dynactin (step 4), which is then  
1008 offloaded to cortical Num1 receptor sites (step 5). Given the lack of apparent Pac1

1009 cortical foci, Pac1 likely dissociates either concomitant with, or subsequent to dynein-  
1010 dynactin offloading.

1011

## 1012 REFERENCES

1013

- 1014 1. Schlager, M. A., Hoang, H. T., Urnavicius, L., Bullock, S. L. & Carter, A. P. In  
1015 vitro reconstitution of a highly processive recombinant human dynein complex.  
1016 *EMBO J* 33, 1855-1868, (2014).
- 1017 2. McKenney, R. J., Huynh, W., Tanenbaum, M. E., Bhabha, G. & Vale, R. D.  
1018 Activation of cytoplasmic dynein motility by dynactin-cargo adapter complexes.  
1019 *Science* 345, 337-341, (2014).
- 1020 3. Reck-Peterson, S. L. *et al.* Single-molecule analysis of dynein processivity and  
1021 stepping behavior. *Cell* 126, 335-348, (2006).
- 1022 4. Moore, J. K., Li, J. & Cooper, J. A. Dynactin function in mitotic spindle  
1023 positioning. *Traffic* 9, 510-527, (2008).
- 1024 5. Moore, J. K., Sept, D. & Cooper, J. A. Neurodegeneration mutations in dynactin  
1025 impair dynein-dependent nuclear migration. *Proc Natl Acad Sci U S A* 106, 5147-  
1026 5152, (2009).
- 1027 6. Reck-Peterson, S. L., Redwine, W. B., Vale, R. D. & Carter, A. P. The  
1028 cytoplasmic dynein transport machinery and its many cargoes. *Nat Rev Mol Cell*  
1029 *Biol* 19, 382-398, (2018).
- 1030 7. Zhang, K. *et al.* Cryo-EM Reveals How Human Cytoplasmic Dynein Is Auto-  
1031 inhibited and Activated. *Cell* 169, 1303-1314 e1318, (2017).
- 1032 8. Amos, L. A. Brain dynein crossbridges microtubules into bundles. *J Cell Sci* 93 (  
1033 Pt 1), 19-28, (1989).
- 1034 9. Toropova, K., Mladenov, M. & Roberts, A. J. Intraflagellar transport dynein is  
1035 autoinhibited by trapping of its mechanical and track-binding elements. *Nat Struct*  
1036 *Mol Biol* 24, 461-468, (2017).
- 1037 10. Jordan, M. A., Diener, D. R., Stepanek, L. & Pigino, G. The cryo-EM structure of  
1038 intraflagellar transport trains reveals how dynein is inactivated to ensure  
1039 unidirectional anterograde movement in cilia. *Nat Cell Biol* 20, 1250-1255,  
1040 (2018).
- 1041 11. Torisawa, T. *et al.* Autoinhibition and cooperative activation mechanisms of  
1042 cytoplasmic dynein. *Nat Cell Biol* 16, 1118-1124, (2014).
- 1043 12. Asante, D., Stevenson, N. L. & Stephens, D. J. Subunit composition of the  
1044 human cytoplasmic dynein-2 complex. *J Cell Sci* 127, 4774-4787, (2014).
- 1045 13. Kardon, J. R., Reck-Peterson, S. L. & Vale, R. D. Regulation of the processivity  
1046 and intracellular localization of *Saccharomyces cerevisiae* dynein by dynactin.  
1047 *Proc Natl Acad Sci U S A* 106, 5669-5674, (2009).
- 1048 14. Sasaki, S. *et al.* A LIS1/NUDEL/cytoplasmic dynein heavy chain complex in the  
1049 developing and adult nervous system. *Neuron* 28, 681-696, (2000).
- 1050 15. Wynshaw-Boris, A. & Gambello, M. J. LIS1 and dynein motor function in  
1051 neuronal migration and development. *Genes & development* 15, 639-651,  
1052 (2001).

- 1053 16. Raaijmakers, J. A., Tanenbaum, M. E. & Medema, R. H. Systematic dissection of  
1054 dynein regulators in mitosis. *J Cell Biol* 201, 201-215, (2013).
- 1055 17. Coquelle, F. M. *et al.* LIS1, CLIP-170's key to the dynein/dynactin pathway. *Mol*  
1056 *Cell Biol* 22, 3089-3102, (2002).
- 1057 18. Tsai, J. W., Bremner, K. H. & Vallee, R. B. Dual subcellular roles for LIS1 and  
1058 dynein in radial neuronal migration in live brain tissue. *Nat Neurosci* 10, 970-979,  
1059 (2007).
- 1060 19. Tsai, J. W., Chen, Y., Kriegstein, A. R. & Vallee, R. B. LIS1 RNA interference  
1061 blocks neural stem cell division, morphogenesis, and motility at multiple stages. *J*  
1062 *Cell Biol* 170, 935-945, (2005).
- 1063 20. Yi, J. Y. *et al.* High-resolution imaging reveals indirect coordination of opposite  
1064 motors and a role for LIS1 in high-load axonal transport. *J Cell Biol* 195, 193-201,  
1065 (2011).
- 1066 21. Chapman, D. E. *et al.* Regulation of in vivo dynein force production by CDK5 and  
1067 14-3-3epsilon and KIAA0528. *Nature communications* 10, 228, (2019).
- 1068 22. Reddy, B. J. *et al.* Load-induced enhancement of Dynein force production by  
1069 LIS1-NudE in vivo and in vitro. *Nature communications* 7, 12259, (2016).
- 1070 23. McKenney, R. J., Vershinin, M., Kunwar, A., Vallee, R. B. & Gross, S. P. LIS1  
1071 and NudE induce a persistent dynein force-producing state. *Cell* 141, 304-314,  
1072 (2010).
- 1073 24. Yamada, M. *et al.* LIS1 and NDEL1 coordinate the plus-end-directed transport of  
1074 cytoplasmic dynein. *EMBO J* 27, 2471-2483, (2008).
- 1075 25. Baumbach, J. *et al.* Lissencephaly-1 is a context-dependent regulator of the  
1076 human dynein complex. *eLife* 6, (2017).
- 1077 26. Gutierrez, P. A., Ackermann, B. E., Vershinin, M. & McKenney, R. J. Differential  
1078 effects of the dynein-regulatory factor Lissencephaly-1 on processive dynein-  
1079 dynactin motility. *J Biol Chem* 292, 12245-12255, (2017).
- 1080 27. Jha, R., Roostalu, J., Cade, N. I., Trokter, M. & Surrey, T. Combinatorial  
1081 regulation of the balance between dynein microtubule end accumulation and  
1082 initiation of directed motility. *EMBO J* 36, 3387-3404, (2017).
- 1083 28. Huang, J., Roberts, A. J., Leschziner, A. E. & Reck-Peterson, S. L. Lis1 acts as a  
1084 "clutch" between the ATPase and microtubule-binding domains of the dynein  
1085 motor. *Cell* 150, 975-986, (2012).
- 1086 29. Toropova, K. *et al.* Lis1 regulates dynein by sterically blocking its  
1087 mechanochemical cycle. *eLife* 3, (2014).
- 1088 30. DeSantis, M. E. *et al.* Lis1 Has Two Opposing Modes of Regulating Cytoplasmic  
1089 Dynein. *Cell* 170, 1197-1208 e1112, (2017).
- 1090 31. Markus, S. M. & Lee, W. L. Regulated offloading of cytoplasmic dynein from  
1091 microtubule plus ends to the cortex. *Dev Cell* 20, 639-651, (2011).
- 1092 32. Dix, C. I. *et al.* Lissencephaly-1 promotes the recruitment of dynein and dynactin  
1093 to transported mRNAs. *J Cell Biol* 202, 479-494, (2013).
- 1094 33. Wang, S. *et al.* Nudel/NudE and Lis1 promote dynein and dynactin interaction in  
1095 the context of spindle morphogenesis. *Mol Biol Cell* 24, 3522-3533, (2013).
- 1096 34. Marzo, M. G. *et al.* Molecular basis for dyneinopathies reveals insight into dynein  
1097 regulation and dysfunction. *bioRxiv*, 635383, (2019).

- 1098 35. Burgess, S. A., Walker, M. L., Sakakibara, H., Knight, P. J. & Oiwa, K. Dynein  
1099 structure and power stroke. *Nature* 421, 715-718, (2003).
- 1100 36. Markus, S. M. & Lee, W. L. Microtubule-dependent path to the cell cortex for  
1101 cytoplasmic dynein in mitotic spindle orientation. *Bioarchitecture* 1, 209-215,  
1102 (2011).
- 1103 37. Curran, K. A. *et al.* Short Synthetic Terminators for Improved Heterologous Gene  
1104 Expression in Yeast. *ACS Synth Biol* 4, 824-832, (2015).
- 1105 38. Schmidt, H., Gleave, E. S. & Carter, A. P. Insights into dynein motor domain  
1106 function from a 3.3-Å crystal structure. *Nat Struct Mol Biol* 19, 492-497, S491,  
1107 (2012).
- 1108 39. Carter, A. P., Cho, C., Jin, L. & Vale, R. D. Crystal structure of the dynein motor  
1109 domain. *Science* 331, 1159-1165, (2011).
- 1110 40. Schmidt, H., Zalyte, R., Urnavicius, L. & Carter, A. P. Structure of human  
1111 cytoplasmic dynein-2 primed for its power stroke. *Nature* 518, 435-438, (2015).
- 1112 41. Gibbons, I. R. *et al.* The affinity of the dynein microtubule-binding domain is  
1113 modulated by the conformation of its coiled-coil stalk. *J Biol Chem* 280, 23960-  
1114 23965, (2005).
- 1115 42. Kon, T. *et al.* Helix sliding in the stalk coiled coil of dynein couples ATPase and  
1116 microtubule binding. *Nat Struct Mol Biol* 16, 325-333, (2009).
- 1117 43. Urnavicius, L. *et al.* Cryo-EM shows how dynactin recruits two dyneins for faster  
1118 movement. *Nature* 554, 202-206, (2018).
- 1119 44. Lee, W. L., Oberle, J. R. & Cooper, J. A. The role of the lissencephaly protein  
1120 Pac1 during nuclear migration in budding yeast. *J Cell Biol* 160, 355-364, (2003).
- 1121 45. Woodruff, J. B., Drubin, D. G. & Barnes, G. Dynein-driven mitotic spindle  
1122 positioning restricted to anaphase by She1p inhibition of dynactin recruitment.  
1123 *Mol Biol Cell* 20, 3003-3011, (2009).
- 1124 46. Markus, S. M. *et al.* Quantitative analysis of Pac1/LIS1-mediated dynein  
1125 targeting: Implications for regulation of dynein activity in budding yeast.  
1126 *Cytoskeleton (Hoboken)* 68, 157-174, (2011).
- 1127 47. Lammers, L. G. & Markus, S. M. The dynein cortical anchor Num1 activates  
1128 dynein motility by relieving Pac1/LIS1-mediated inhibition. *J Cell Biol* 211, 309-  
1129 322, (2015).
- 1130 48. Markus, S. M., Punch, J. J. & Lee, W. L. Motor- and tail-dependent targeting of  
1131 dynein to microtubule plus ends and the cell cortex. *Curr Biol* 19, 196-205,  
1132 (2009).
- 1133 49. Lee, W. L., Kaiser, M. A. & Cooper, J. A. The offloading model for dynein  
1134 function: differential function of motor subunits. *J Cell Biol* 168, 201-207, (2005).
- 1135 50. Yin, H., Pruyne, D., Huffaker, T. C. & Bretscher, A. Myosin V orientates the  
1136 mitotic spindle in yeast. *Nature* 406, 1013-1015, (2000).
- 1137 51. Hwang, E., Kusch, J., Barral, Y. & Huffaker, T. C. Spindle orientation in  
1138 *Saccharomyces cerevisiae* depends on the transport of microtubule ends along  
1139 polarized actin cables. *J Cell Biol* 161, 483-488, (2003).
- 1140 52. Liakopoulos, D., Kusch, J., Grava, S., Vogel, J. & Barral, Y. Asymmetric loading  
1141 of Kar9 onto spindle poles and microtubules ensures proper spindle alignment.  
1142 *Cell* 112, 561-574, (2003).



- 1143 53. Miller, R. K. & Rose, M. D. Kar9p is a novel cortical protein required for  
1144 cytoplasmic microtubule orientation in yeast. *J Cell Biol* 140, 377-390, (1998).
- 1145 54. Ecklund, K. H. *et al.* She1 affects dynein through direct interactions with the  
1146 microtubule and the dynein microtubule-binding domain. *Nature communications*  
1147 8, 2151, (2017).
- 1148 55. Markus, S. M., Kalutkiewicz, K. A. & Lee, W. L. She1-mediated inhibition of  
1149 dynein motility along astral microtubules promotes polarized spindle movements.  
1150 *Curr Biol* 22, 2221-2230, (2012).
- 1151 56. Redwine, W. B. *et al.* Structural basis for microtubule binding and release by  
1152 dynein. *Science* 337, 1532-1536, (2012).
- 1153 57. Sheeman, B. *et al.* Determinants of *S. cerevisiae* dynein localization and  
1154 activation: implications for the mechanism of spindle positioning. *Curr Biol* 13,  
1155 364-372, (2003).
- 1156 58. Blake-Hodek, K. A., Cassimeris, L. & Huffaker, T. C. Regulation of microtubule  
1157 dynamics by Bim1 and Bik1, the budding yeast members of the EB1 and CLIP-  
1158 170 families of plus-end tracking proteins. *Mol Biol Cell* 21, 2013-2023, (2010).
- 1159 59. Faulkner, N. E. *et al.* A role for the lissencephaly gene LIS1 in mitosis and  
1160 cytoplasmic dynein function. *Nat Cell Biol* 2, 784-791, (2000).
- 1161 60. Duellberg, C. *et al.* Reconstitution of a hierarchical +TIP interaction network  
1162 controlling microtubule end tracking of dynein. *Nat Cell Biol*, (2014).
- 1163 61. Li, J., Lee, W. L. & Cooper, J. A. NudEL targets dynein to microtubule ends  
1164 through LIS1. *Nat Cell Biol* 7, 686-690, (2005).
- 1165 62. Scoto, M. *et al.* Novel mutations expand the clinical spectrum of DYNC1H1-  
1166 associated spinal muscular atrophy. *Neurology*, (2015).
- 1167 63. Poirier, K. *et al.* Mutations in TUBG1, DYNC1H1, KIF5C and KIF2A cause  
1168 malformations of cortical development and microcephaly. *Nature genetics* 45,  
1169 639-647, (2013).
- 1170 64. Willemsen, M. H. *et al.* Mutations in DYNC1H1 cause severe intellectual disability  
1171 with neuronal migration defects. *Journal of medical genetics* 49, 179-183, (2012).
- 1172 65. Bi, E. & Pringle, J. R. ZDS1 and ZDS2, genes whose products may regulate  
1173 Cdc42p in *Saccharomyces cerevisiae*. *Mol Cell Biol* 16, 5264-5275, (1996).
- 1174 66. Knop, M. *et al.* Epitope tagging of yeast genes using a PCR-based strategy:  
1175 more tags and improved practical routines. *Yeast* 15, 963-972, (1999).
- 1176 67. Longtine, M. S. *et al.* Additional modules for versatile and economical PCR-  
1177 based gene deletion and modification in *Saccharomyces cerevisiae*. *Yeast* 14,  
1178 953-961, (1998).
- 1179 68. Markus, S. M., Omer, S., Baranowski, K. & Lee, W. L. Improved Plasmids for  
1180 Fluorescent Protein Tagging of Microtubules in *Saccharomyces cerevisiae*.  
1181 *Traffic* 16, 773-786, (2015).
- 1182 69. Song, S. & Lee, K. S. A novel function of *Saccharomyces cerevisiae* CDC5 in  
1183 cytokinesis. *J Cell Biol* 152, 451-469, (2001).
- 1184 70. Weissmann, F. *et al.* biGBac enables rapid gene assembly for the expression of  
1185 large multisubunit protein complexes. *Proc Natl Acad Sci U S A* 113, E2564-  
1186 2569, (2016).
- 1187 71. Gibson, D. G. *et al.* Enzymatic assembly of DNA molecules up to several  
1188 hundred kilobases. *Nat Methods* 6, 343-345, (2009).



- 1189 72. Kelley, L. A., Mezulis, S., Yates, C. M., Wass, M. N. & Sternberg, M. J. The  
1190 Phyre2 web portal for protein modeling, prediction and analysis. *Nat Protoc* 10,  
1191 845-858, (2015).
- 1192 73. Heil-Chapdelaine, R. A., Oberle, J. R. & Cooper, J. A. The cortical protein Num1p  
1193 is essential for dynein-dependent interactions of microtubules with the cortex. *J*  
1194 *Cell Biol* 151, 1337-1344, (2000).
- 1195
